1 **Sequence-unrelated long noncoding RNAs converged to modulate the activity of**  
2 **conserved epigenetic machineries across kingdoms**

3

4 Camille Fonouni-Farde<sup>1</sup>, Aurélie Christ<sup>2,3</sup>, Thomas Blein<sup>2,3</sup>, Juan Sebastián Ramírez-Prado<sup>2,3</sup>, María  
5 Florencia Legascue<sup>1</sup>, David Latrasse<sup>2,3</sup>, Michaël Moison<sup>1</sup>, Leandro Lucero<sup>1</sup>, Lucía Ferrero<sup>1</sup>, Daniel  
6 Gonzalez<sup>1</sup>, Moussa Benhamed<sup>2,3</sup>, Leandro Quadrana<sup>4</sup>, Martin Crespi<sup>2,3</sup> and Federico Ariel<sup>1\*</sup>.

7

8 <sup>1</sup>Instituto de Agrobiotecnología del Litoral, CONICET, Universidad Nacional del Litoral, Colectora  
9 Ruta Nacional 168 km 0, 3000, Santa Fe, Argentina.

10 <sup>2</sup>Institute of Plant Sciences Paris Saclay IPS2, CNRS, INRA, Université Evry, Université Paris-Saclay,  
11 Bâtiment 630, 91405 Orsay, France.

12 <sup>3</sup>Institute of Plant Sciences Paris-Saclay IPS2, Université de Paris, Bâtiment 630, 91405 Orsay,  
13 France.

14 <sup>4</sup>Institut de Biologie de l'Ecole Normale Supérieure (IBENS), Centre National de la Recherche  
15 Scientifique (CNRS), Institut National de la Santé et de la Recherche Médicale (INSERM), Ecole  
16 Normale Supérieure, PSL Research University, Paris, 75005, France.

17

18 \* Correspondence to: FA ([fariel@santafe-conicet.gov.ar](mailto:fariel@santafe-conicet.gov.ar))

19

20 **Running title: lncRNAs regulate Polycomb and DNA methylation**

21

22 Keywords: Long noncoding RNA; DNA methylation; PRC1; Polycomb; RdDM;  
23 Thermomorphogenesis; Auxin; R-loop; *APOLO*; LHP1; *UPAT*; VIM1; UHRF1; *YUCCA2*

24

25

26 **SUMMARY**

27 RNA-DNA hybrid (R-loop)-associated long noncoding RNAs (lncRNAs), including the  
28 Arabidopsis lncRNA *AUXIN-REGULATED PROMOTER LOOP (APOLO)*, are emerging as important  
29 regulators of three-dimensional chromatin conformation and gene transcriptional activity. Here,  
30 we showed that in addition to the PRC1-component LIKE-HETEROCHROMATIN PROTEIN 1 (LHP1),  
31 *APOLO* interacts with the methylcytosine-binding protein VARIANT IN METHYLATION 1 (VIM1), a  
32 conserved homolog of the mammalian DNA methylation regulator UBIQUITIN-LIKE CONTAINING  
33 PHD AND RING FINGER DOMAINS 1 (UHRF1). The *APOLO*-VIM1-LHP1 complex directly regulates  
34 the transcription of the auxin biosynthesis gene *YUCCA2* by dynamically determining DNA  
35 methylation and H3K27me3 deposition over its promoter during the plant thermomorphogenic  
36 response. Strikingly, we demonstrated that the lncRNA *UHRF1 Protein Associated Transcript*  
37 (*UPAT*), a direct interactor of UHRF1 in humans, can be recognized by VIM1 and LHP1 in plant  
38 cells, despite the lack of sequence homology between *UPAT* and *APOLO*. In addition, we showed  
39 that increased levels of *APOLO* or *UPAT* hamper VIM1 and LHP1 binding to *YUCCA2* promoter.  
40 Collectively, our results uncover a new mechanism in which a plant lncRNA coordinates Polycomb  
41 action and DNA methylation, and reveal that evolutionary unrelated lncRNAs may exert similar  
42 functions across kingdoms.

## 43 INTRODUCTION

44 In eukaryotes, chromatin structure, composition and dynamics determine the three-  
45 dimensional configuration of the genome and are critical for gene regulation, cell fate and function  
46 (Yu and Ren, 2017; Doğan and Liu, 2018). Chromatin conformation and related transcriptional  
47 states depend on coordinated shifts in DNA methylation, post-translational modifications of  
48 histone tails and RNA interference (RNAi) pathways (Tamaru and Selker, 2001; Jaenisch and Bird,  
49 2003; Matzke and Birchler, 2005). In mammalian genomes, DNA methylation is primarily observed  
50 at CpG dinucleotides and is estimated to occur at ~70-80% of CpG sites throughout the genome  
51 (Lister et al., 2009). A quarter of non-CG methylation is found in embryonic stem cells, while the  
52 remaining unmethylated CpG sites are mostly found in dense clusters, near gene promoters,  
53 referred to as CpG islands (Ramsahoye et al., 2000; Suzuki and Bird, 2008; Varley et al., 2013).  
54 Unlike in mammals, DNA methylation in plants predominantly occurs on transposons and other  
55 repetitive DNA elements, and exists in all possible sequence contexts: symmetric CpG and CpHpG  
56 – where H is any base except G – or asymmetric CpHpH (Zhang et al., 2006; Johnson et al., 2007).  
57 Non-CpG methylation is mainly distributed at heterochromatin regions, nevertheless, many  
58 euchromatic genes exhibit cytosine methylation in their promoter, a feature likely correlated with  
59 tissue specificity (Zhang et al., 2006).

60 In *Arabidopsis thaliana*, the establishment of *de novo* methylation in all sequence contexts  
61 is catalyzed by DOMAINS REARRANGED METHYLTRANSFERASE 2 (DRM2), a plant homolog of  
62 mammalian DNA (CYTOSINE-5)-METHYLTRANSFERASE 3 (DNMT3) a and b (Cao and Jacobsen,  
63 2002; Law and Jacobsen, 2010). DRM2 is guided to chromatin by 24-nucleotide small interfering  
64 RNAs (24nt siRNAs) as part of a pathway known as RNA-directed DNA methylation (RdDM; Cuerda-  
65 Gil and Slotkin, 2016). RdDM involves two non-redundant plant specific RNA polymerases, Pol IV  
66 and Pol V, in addition to the canonical RNA interference machinery, which requires the activity of  
67 RNA-dependent RNA polymerase 2 (RDR2) and members of the Dicer and Argonaute families  
68 (Wassenegger et al., 1994; Huettel et al., 2007; Pikaard et al., 2008; Law et al., 2010). Once  
69 established, DNA methylation is maintained by three different pathways depending on the  
70 sequence context. CpG methylation depends on DNA METHYLTRANSFERASE 1 (MET1), a homolog  
71 of mammalian DNA METHYLTRANSFERASE 1 (DNMT1; Finnegan et al., 1996; Kankel et al., 2003).  
72 CpHpG methylation relies on CHROMOMETHYLASE 3 (CMT3), a plant specific DNA  
73 methyltransferase that associates with SU(VAR)3–9 HOMOLOG (SUVH) histone methyltransferases  
74 and recognizes dimethylated histone 3 tails at lysine 9 (H3K9me2; Ebbs and Bender, 2006;

75 Henderson and Jacobsen, 2007; Johnson et al., 2007; Du et al., 2012; Stroud et al., 2014). Finally,  
76 CpHpH methylation is maintained through persistent *de novo* methylation by DRM2 and by the  
77 CMT3 homolog CHROMOMETHYLASE 2 (CMT2) that specifically reads the H3K9me2 mark (Stroud  
78 et al., 2013, 2014; Zemach et al., 2013).

79         Beside the contribution of methyltransferases, the DNA methylation process involves  
80 methylcytosine-binding proteins of the VARIANT IN METHYLATION (VIM/ORTH) family (Woo et al.,  
81 2007, 2008). VIM/ORTH proteins are homologous to the mammalian UBIQUITIN-LIKE CONTAINING  
82 PHD AND RING FINGER DOMAINS (UHRF) proteins known to regulate cytosine methylation  
83 through the recruitment of DNMT1 to target loci (Bostick et al., 2007; Sharif et al., 2007; Kraft et  
84 al., 2008; Bronner et al., 2019). In particular, UHRF1 functions as an epigenetic regulator  
85 maintaining DNA methylation and histone modifications (Xue et al., 2019), and is stabilized by  
86 direct interaction with the long noncoding RNA (lncRNA) *UPAT (UHRF1 Protein Associated*  
87 *Transcript*; Taniue et al., 2016). VIM proteins are characterized by the presence of a PHD domain  
88 recognizing trimethylated histone 3 tails at lysine 4 (H3K4me3; Li et al., 2006; Peña et al., 2006; Shi  
89 et al., 2006; Wysocka et al., 2006), a SRA (SET [Su(var), Enhancer of Zeste, Trithorax] and RING  
90 [Really Interesting New Gene] Associated) domain that can associate with methylated DNA (Unoki  
91 et al., 2004; Johnson et al., 2007; Woo et al., 2007), and two RING domains conferring ubiquitin E3  
92 ligase activity (Kraft et al., 2008). The Arabidopsis genome encodes five highly similar VIM proteins  
93 – named VIM1 to 5 – and a related protein ORTH-LIKE1 (ORL1/VIM6; Kraft et al., 2008). VIM1,  
94 VIM2 and VIM3 maintain MET1-mediated cytosine methylation at CpG dinucleotides throughout  
95 the genome and have been reported to function entirely redundantly to mediate epigenetic  
96 transcriptional silencing in collaboration with MET1 (Woo et al., 2008; Stroud et al., 2013; Shook  
97 and Richards, 2014).

98         Interestingly, aberrant changes in active and repressive histone modifications have been  
99 observed in *vim1/2/3* and *met1* mutants, supporting that VIM proteins coordinate DNA  
100 methylation and histone modification (Soppe et al., 2002; Tariq et al., 2003; Deleris et al., 2012;  
101 Kim et al., 2014). In Arabidopsis, the transcriptionally repressive mark histone H3 lysine 27  
102 trimethylation (H3K27me3) is largely restricted to the transcribed regions of single genes,  
103 exhibiting a global anti-correlated distribution with centromeric-enriched DNA methylation  
104 (Mathieu et al., 2005; Johnson et al., 2007; Deleris et al., 2012). However, a loss of H3K27me3 was  
105 also reported at gene bodies in *met1* mutants and at specific VIM1 targets located in euchromatic  
106 regions in the *vim1/2/3* triple mutant (Deleris et al., 2012). Notably, the correlation between DNA

107 hypomethylation and H3K27me3 reduction in the *vim1/2/3* mutation was more prevalent in  
108 promoter regions than in transcribed regions (Kim et al., 2014b). Collectively, these observations  
109 hint at non-canonical mechanisms linking DNA methylation and repressive histone modifications  
110 over specific transcriptionally active loci.

111 In *A. thaliana*, H3K27me3 is deposited by Polycomb group (PcG) proteins in euchromatic  
112 regions containing protein-coding genes and is maintained by the plant Polycomb Repressive  
113 Complex 1 (PRC1) component LIKE HETEROCHROMATIN PROTEIN 1 (LHP1), a homolog of  
114 mammalian HETEROCHROMATIN PROTEIN 1 (HP1; Gaudin et al., 2001; Hsieh et al., 2003; Turck et  
115 al., 2007; Veluchamy et al., 2016). LHP1 capacity to localize and mediate epigenetic repression of  
116 PcG target genes was shown to rely on its RNA-binding hinge region, suggesting that LHP1 activity  
117 could be modulated by interacting RNAs (Berry et al., 2017). Consistently, it was shown that the  
118 lncRNA *APOLO* (*AUXIN-REGULATED PROMOTER LOOP*) can regulate local chromatin conformation  
119 by decoying LHP1 away from target loci. *APOLO* directly recognizes multiple distant and  
120 independent auxin-related loci across the *A. thaliana* genome by short sequence complementarity  
121 and the formation of DNA-RNA duplexes (R-loops; Ariel et al., 2014, 2020).

122 Here, we demonstrated that in addition to the PRC1 component LHP1, *APOLO* lncRNA  
123 interacts *in vivo* with VIM1, the plant homolog of UHRF1, linking Polycomb and DNA methylation  
124 machineries. RNA-sequencing analyses of *APOLO* over-expression and *vim1* mutant lines revealed  
125 that *APOLO* and VIM1 control a large common set of genes related to the thermomorphogenic  
126 response. In particular, the *APOLO*-VIM1-LHP1 complex directly targets the heat-responsive auxin-  
127 biosynthetic gene *YUCCA2* and conjointly mediates cytosine methylation and H3K27me3  
128 deposition at its promoter, representing a new epigenetic mechanism regulating the plant  
129 response to warm temperatures. Strikingly, we also demonstrate that the lncRNA *UPAT*, known to  
130 recognize UHRF1 in humans, can interact with VIM1 and LHP1 in plant cells despite the lack of  
131 sequence homology between *UPAT* and *APOLO*. Furthermore, similarly to *APOLO* over-expression,  
132 *UPAT* constitutive transcription in Arabidopsis plants precludes LHP1 and VIM1 binding to the  
133 *YUCCA2* promoter region. Hence, sequence-unrelated lncRNAs may exert similar molecular  
134 functions across kingdoms, integrating the epigenetic regulation of gene expression.

135

## 136 **RESULTS**

137 **Long noncoding RNA *APOLO* associates with the methylcytosine-binding protein VIM1 *in vivo***

138 In order to investigate the composition of the ribonucleoprotein complexes integrated by  
139 the lncRNA *APOLO*, we performed an exploratory Chromatin isolation by RNA purification (ChIRP)  
140 followed by protein precipitation and mass spectrometry. We used two independent sets of  
141 biotinylated DNA probes against *APOLO* (ODD and EVEN sets) and LacZ-probes as a negative  
142 control. Among the proteins identified by at least two positive hits of unique peptides in ODD and  
143 EVEN, excluded from LacZ ChIRPs, we found the protein VARIANT IN METHYLATION 1 (VIM1,  
144 AT1G57820; (Woo et al., 2007)). Transient expression of *GFP-VIM1* in *Nicotiana benthamiana* and  
145 *Arabidopsis thaliana* leaves revealed that VIM1 is located in the cell nucleus, in agreement with  
146 previous observations (Woo et al., 2007). Moreover, this localization was observed regardless of  
147 the co-expression with nuclear-enriched *APOLO* transcripts (**Supplementary Figure 1A-B**). Anti-  
148 GFP RNA immunoprecipitation (RIP) in *N. benthamiana* leaves transiently co-transformed with  
149 *GFP-VIM1* and *APOLO*, or in stably transformed *Arabidopsis* seedlings over-expressing *GFP-VIM1*  
150 (OE *VIM1-1*; **Figure 1A**; *VIM1* levels shown in **Supplementary Figure 2A**), revealed a high  
151 enrichment of *APOLO* transcripts in VIM1 immunoprecipitated samples. These results indicate that  
152 VIM1 is part of a novel ribonucleoprotein complex integrated by *APOLO* lncRNA.

153

#### 154 ***APOLO* and *VIM1* are important thermomorphogenesis regulators in *Arabidopsis thaliana***

155 Abnormal morphological phenotypes, including DNA methylation-dependent late  
156 flowering, were previously reported for the *vim1/2/3* triple mutant in contrast to the *vim1* single  
157 mutant exhibiting no evident phenotype (Woo et al., 2008). We thus wondered in what  
158 developmental context the *APOLO*-VIM1 interaction may occur and exert a regulatory role over  
159 target genes. By exploring the eFP *Arabidopsis* transcriptomic database (Winter et al., 2007), we  
160 found that *VIM1*, *VIM2* and *VIM3* genes showed different transcriptional dynamics following heat  
161 stress (38°C followed by recovery at 25°C; **Supplementary Figure 3A**, blue box). Therefore, we  
162 evaluated the expression of these three genes and *APOLO* at 29°C, a warm temperature usually  
163 faced by *Arabidopsis* in the wild (Parent and Tardieu, 2012). Remarkably, after 6h of exposure to  
164 29°C, *APOLO* transcript levels decreased while *VIM1* transcript levels increased together with the  
165 warmth-response markers *PIF4* and *YUC8* (**Figure 1B**; **Supplementary Figure 3B**). In contrast to  
166 *VIM1*, the transcriptional accumulation of *VIM2* and *VIM3* was repressed or unaffected,  
167 respectively (**Supplementary Figure 3C**).

168 To assess whether the ribonucleoprotein complex integrated by *APOLO* and *VIM1* is  
169 involved in the response to warmth, we tested the effect of their deregulation on the

170 thermomorphogenesis response. Strikingly, two independent *APOLO* overexpression (OE) lines (OE  
171 *APOLO*-1 and OE *APOLO*-2; (Ariel et al., 2020)), together with two independent *vim1* insertional  
172 mutants resulting in a complete loss of function or knock-down of *VIM1* (*vim1*-2 and *vim1*-3,  
173 respectively; **Supplementary Figure 2B-C**), exhibited an impaired hypocotyl elongation after four  
174 days at 29°C (**Figure 1C-F**; **Supplementary Table 1**). Additionally, we observed a slight but  
175 significant reduction of hypocotyl elongation at 29°C only in one out of two independent RNAi  
176 *APOLO* lines (RNAi *APOLO*-1 and RNAi *APOLO*-2; Ariel et al., 2014; **Supplementary Figure 4A, C**;  
177 **Supplementary Table 1**) and a minor but significant induction of hypocotyl elongation in OE *VIM1*  
178 lines (OE *VIM1*-1 and OE *VIM1*-2; **Supplementary Figure 2A**; **Supplementary Figure 4B, D**;  
179 **Supplementary Table 1**). Altogether, these results suggest that *APOLO* and *VIM1* regulate  
180 thermomorphogenesis and incidentally indicate that *VIM1* is not redundant with *VIM2* or *VIM3* in  
181 this developmental context.

182 To pinpoint molecular mechanisms that could explain impaired thermomorphogenesis  
183 upon *APOLO* or *VIM1* deregulation, we profiled the transcriptomes of 4-day-old OE *APOLO*-1 and  
184 *vim1*-3 seedlings grown at 23°C with RNA-Seq of 4-day-old wild-type (WT) seedlings grown at 23°C  
185 and subjected or not to heat (29°C) for 6h. In WT seedlings, warmth caused the downregulation of  
186 over 3,400 transcripts and the upregulation of approximately 2,650 transcripts (**Supplementary**  
187 **Table 2**). Remarkably, 56% of the total set of up and downregulated transcripts at 29°C in WT were  
188 already deregulated at 23°C in OE *APOLO*-1 and/or *vim1*-3 (3,403 genes over 6,073; **Figure 1G**),  
189 whereas 52% of these transcripts (1,782 out of 3,403) were deregulated in both OE *APOLO*-1 and  
190 *vim1*-3 at 23°C (**Figure 1G**, central intersection). Moreover, a heatmap analysis revealed that a  
191 subset of up and downregulated genes in response to warmth in WT behave consistently in OE  
192 *APOLO*-1 and *vim1*-3 at ambient temperature (**Figure 1H**). A GO analysis of upregulated transcripts  
193 in WT in response to warmth revealed the enriched categories “Response to auxin”, “Cellular  
194 response to auxin stimulus” and “Auxin-activated signaling pathway” (**Figure 1H**; **Supplementary**  
195 **Figure 5**), in accordance with the role reported for auxin in thermomorphogenesis (Franklin et al.,  
196 2011). Altogether, these transcriptomic analyses hint at a critical role for the *APOLO*-*VIM1*  
197 complex in the transcriptional reprogramming of gene expression in response to warm  
198 temperatures.

199 We then aimed at identifying the potential direct targets of the *APOLO*-*VIM1* complex  
200 during the thermomorphogenic response. Given the well-known role of *VIM1* in DNA methylation,  
201 we compared the list of hypo-methylated genes in *vim1* vs. WT identified by Bisulfite-Sequencing

202 analyses (BiS-Seq; Stroud et al., 2013), with potential *APOLO* direct targets identified by *APOLO*-  
203 ChIRP-Seq (Ariel et al., 2020). Interestingly, among the candidate common targets we found  
204 *YUCCA2* (*YUC2*, AT4G13260; **Supplementary Table 3**), a heat-responsive gene involved in auxin  
205 biosynthesis (Mashiguchi et al., 2011; Sakata et al., 2010). By using a *proYUC2:GUS* transcriptional  
206 fusion (Cheng et al., 2006), we observed that the *YUC2* promoter region is activated in the  
207 hypocotyl of 4-day-old seedlings grown at 29°C (**Figure 2A**). In addition, *yuc2* loss-of-function  
208 mutant seedlings (Cheng et al., 2006) exhibited a reduced hypocotyl elongation after 4 days at  
209 29°C (**Figure 2B; Supplementary Table 1**), indicating that *YUC2* is required for a proper  
210 thermomorphogenic response. Consistently, we observed that the transcriptional activation of  
211 *YUC2* after 6h at 29°C was impaired in OE *APOLO*-1 and *vim1-3* showing an altered hypocotyl  
212 elongation (**Figure 2C**), further suggesting that the *APOLO*-VIM1 complex directly regulates *YUC2*  
213 to trigger the plant auxin-related thermomorphogenic response at warm temperatures.

214

#### 215 ***APOLO* and VIM1 directly mediate heat-dependent methylation at the *YUCCA2* promoter**

216 As *APOLO* recognizes its target loci by sequence complementarity and R-loop formation,  
217 we first investigated the *APOLO* binding profile over the *YUC2* locus by ChIRP-Seq (Ariel et al.,  
218 2020). Compared to the LacZ-probes used as a negative control, ODD and EVEN probes showed  
219 specific binding of *APOLO* across the *YUC2* locus, notably to the exon 1, displaying six *APOLO*-  
220 binding motifs “GAAGAA/TTCTTC” (**Figure 2D**, first three tracks in blue and light blue, binding  
221 motifs indicated as red dots over the *YUC2* locus). *APOLO* ChIRP-qPCR over *YUC2* gene body in WT  
222 and RNAi *APOLO*-1 seedlings confirmed the specificity of the interaction (**Figure 2E**). Furthermore,  
223 DNA-RNA immunoprecipitation followed by sequencing (DRIP-Seq; Xu et al., 2017) revealed that R-  
224 loop formation occurs in the exon 1 of *YUC2*, in correlation with *APOLO* binding (**Figure 2D**, red  
225 box), suggesting that *APOLO* directly recognizes *YUC2* through the formation of R-loops.  
226 Consistently, DRIP-qPCR in WT and RNAi *APOLO*-1 seedlings revealed that R-loop formation over  
227 the *YUC2* locus depends on *APOLO* expression (**Figure 2F**).

228 Interestingly, a NRPE1 Pol V-subunit Chromatin immunoprecipitation (ChIP)-Seq (Johnson  
229 et al., 2014) revealed that the *YUC2* promoter region, located 560 to 1010 bp upstream of *YUC2*  
230 TSS, is directly regulated by Pol V in a MET1-dependent manner (**Figure 2D**, black box;  
231 **Supplementary Figure 6A**). In addition, a small RNA-Seq profiling reported a temperature-  
232 dependent accumulation of RdDM-related 24nt siRNAs over this locus (Gyula et al., 2018;  
233 **Supplementary Figure 6B**), suggesting that DNA methylation in this regulatory region may



234 contribute to the temperature-induced transcriptional regulation of *YUC2*. We thus assessed VIM1  
235 binding and DNA methylation at the *YUC2* promoter region in the same developmental stage as  
236 our phenotypic characterization. GFP-VIM1 ChIP performed in 4-day-old seedlings grown at 23°C  
237 and treated or not at 29°C for 6h, revealed that VIM1 binds to the region located 357 to 494 bp  
238 upstream of *YUC2* TSS and that this binding is reduced at 29°C compared to 23°C (**Figure 2G**). In  
239 addition, Bis-Seq analyses of WT seedlings grown at 23°C reported cytosine methylation in all  
240 sequence contexts in the region located 360 to 610 bp upstream of *YUC2* TSS (**Figure 3A**;  
241 **Supplementary Figure 7**). Remarkably, CpHpH methylation over this region is significantly reduced  
242 in *vim1-3* (**Figure 3B**; **Supplementary Figure 7**), hinting at a critical role for VIM1 in the  
243 maintenance of non-CpG methylation at the *YUC2* locus. Methylated DNA immunoprecipitation  
244 (MeDIP) served to confirm these results and additionally revealed that DNA methylation is  
245 reduced in this region in the WT after 6h at 29°C (**Figure 3C**). Furthermore, in OE *APOLO-1* and  
246 *vim1-3*, DNA methylation levels resulted to be lower at 23°C and increased at 29°C, exhibiting the  
247 opposite behavior to the WT (**Figure 3C**).

248 To further support the relevance of RdDM on *YUC2* regulation in the context of  
249 thermomorphogenesis, we additionally characterized the physiological response to warm  
250 temperatures of RdDM mutants *nrrpd2a* (a common subunit of Pol IV and Pol V), *rdr2-5*, *dcl3-1* and  
251 *ago4-8*, as well as CpG methyltransferase mutant *met1-2* and non-CpG methyltransferase mutants  
252 *cmt2-7* and *cmt3-11* (for a visual summary of their respective roles in RdDM, see **Supplementary**  
253 **Figure 8A**). Hypocotyl elongation at 29°C was reduced in *nrrpd2a*, *met1-2*, *rdr2-5*, *dcl3-1* and *ago4-*  
254 *8* backgrounds, whereas it was unaffected in *cmt3-11* and slightly enhanced in *cmt2-7*  
255 backgrounds (**Figure 3D-F**; **Supplementary 8B-H**; **Supplementary Table 1**). In agreement, Bis-Seq  
256 analyses (Stroud et al., 2013) revealed that RdDM and *met1-2* mutants showing impaired  
257 thermomorphogenesis also displayed reduced CpHpH methylation levels in the *YUC2* regulatory  
258 region (**Supplementary Figure 6C-D**, blue box), further supporting that epigenetic modifications  
259 regulating DNA methylation at *YUC2* promoter are critical to modulate thermomorphogenesis.  
260 Taken together, our results indicate that *APOLO* and VIM1 directly mediate DNA methylation at  
261 *YUC2* promoter in response to warm temperatures, in a process likely controlled also by the RdDM  
262 pathway.

263

264 **VIM1 and LHP1 cooperate to regulate temperature-dependent histone and DNA methylation at**  
265 **the *YUCCA2* promoter**

266           Given that the plant PRC1 component LHP1 recognizes *APOLO in vivo* and co-regulates  
267 common target loci across the Arabidopsis genome (Ariel et al., 2014, 2020), we explored whether  
268 the *YUC2* locus was regulated by LHP1 and the related transcriptionally repressive mark  
269 H3K27me3. ChIP-Seq analyses (Veluchamy et al., 2016) revealed that the *YUC2* locus is enriched in  
270 LHP1 and H3K27me3 in standard growing conditions (**Figure 4A**), both drastically reduced at 29°C  
271 over the promoter region (**Figure 4A**, black box; **Figure 4B-C**). Moreover, LHP1 binding to the *YUC2*  
272 gene body was impaired by *APOLO* over-expression (**Figure 4A**, blue box; **Figure 4D**). Consistent  
273 with an involvement of LHP1 in the thermomorphogenic response, 4-day-old *lhp1* loss-of-function  
274 mutant seedlings (Veluchamy et al., 2016) exhibited a reduced hypocotyl elongation at 29°C and  
275 no induction of *YUC2* after 6h at 29°C (**Figure 4E-F**; **Supplementary Table 1**). Taken together, these  
276 results suggest that in addition to VIM1-dependent DNA methylation, the PcG-dependent histone  
277 methylation machinery also directly regulates *YUC2* expression in response to warm temperatures.

278           Considering the similarities between VIM1 and LHP1 behaviors at the *YUC2* locus, we  
279 wondered if VIM1-associated DNA methylation and LHP1-related H3K27me3 transcriptional  
280 regulations were dependent on each other, and if the two proteins interacted *in vivo*. By  
281 performing BiS-Seq of *lhp1* vs. WT seedlings at 23°C, we observed that the *YUC2* regulatory region  
282 in the proximal promoter displayed lower levels of cytosine methylation in all sequence contexts  
283 in the *lhp1* mutant (**Figure 5A-B**; **Supplementary Figure 7**, blue box), similarly to the pattern  
284 observed in the *vim1-3* mutant (**Figure 3A-B**). Moreover, global DNA methylation resulted to be  
285 restored at 29°C in *lhp1*, exhibiting opposite behavior to the WT (**Figure 5C**) and the same trend as  
286 OE *APOLO-1* and *vim1-3* (**Figure 3C**). To further elucidate the link between LHP1 and VIM1, we  
287 assessed the levels of H3K27me3 and LHP1 capacity to bind to the *YUC2* promoter region in 4-day-  
288 old *vim1-3* seedlings. Notably, LHP1 binding and H3K27me3 levels were impaired in *vim1-3* (**Figure**  
289 **5D-E**). In combination, these results indicate that while *lhp1* mutation affects DNA methylation of  
290 a VIM1-target region, *vim1* mutation impairs LHP1 binding and H3K27me3 deposition on the same  
291 locus, hinting at a cooperative interaction between these two epigenetic factors. Additionally, by  
292 performing Bimolecular fluorescence complementation (BiFC) assays in *N. benthamiana* leaves  
293 transiently transformed with *CYPF-VIM1* and *NYFP-LHP1* we observed an interaction between the  
294 two proteins (**Figure 5F**; **Supplementary Figure 9**). Altogether, our results suggest that the lncRNA  
295 *APOLO* associates with both a regulator of DNA methylation (VIM1) and a PcG component (LHP1),  
296 which further cooperate to mediate DNA methylation and H3K27me3 deposition at a specific  
297 *APOLO* target locus.

298

299 **Human lncRNA *UPAT* can exert similar regulatory functions as *APOLO* in *planta***

300 Arabidopsis VIM1 is a homolog of the mammalian methylcytosine-binding protein UHRF1  
301 (Kraft et al., 2008; Feng et al., 2010). Interestingly, UHRF1 was shown to directly recognize *in vivo*  
302 the human lncRNA *UPAT*, through its flexible spacer region positioned between the SRA and RING  
303 domains (Fang et al., 2016; Taniue et al., 2016; Wang et al., 2018). This interaction stabilizes  
304 UHRF1 by interfering with its ubiquitination and subsequent degradation (Taniue et al., 2016). In  
305 order to determine if VIM1 and UHRF1 interaction with lncRNAs is conserved between plants and  
306 animals, we delimited the minimal region of VIM1 that interacts with *APOLO*. We generated  
307 independent GFP fusion constructs bearing different *VIM1* coding regions, according to Woo et al.,  
308 2007 (**Figure 6A right panel**). All the construct-encoded proteins accumulated exclusively or  
309 partially in the nucleus of *N. benthamiana* cells, with or without *APOLO* co-expression  
310 (**Supplementary Figure 10A-B**). Similar to the reported interaction between UHRF1 and *UPAT*  
311 (Taniue et al., 2016), an anti-GFP RIP performed in *N. benthamiana* leaves transiently co-  
312 transformed with *APOLO* and GFP-VIM1 derivatives revealed that the two VIM1 portions  
313 containing the full spacer region (GFP-SRA/RING2 and GFP-Spacer) bind to *APOLO in vivo*, although  
314 with lower efficiency than the full-length VIM1 (**Figure 6A**). Thus, our results indicate that the  
315 domain of VIM1 and UHRF1 involved in the interaction with lncRNAs is evolutionary conserved  
316 between plants and animals.

317 Considering the common ability of the conserved VIM1 and UHRF1 proteins to interact  
318 with lncRNAs, we wondered whether the lncRNA *UPAT*, exhibiting no apparent sequence  
319 homology with *APOLO* (**Supplementary Figure 10C**), could interact with VIM1 and its partner LHP1  
320 *in planta*. Strikingly, an anti-GFP RIP in *N. benthamiana* leaves transiently co-transformed with  
321 *UPAT* and *GFP-UHRF1*, *GFP-VIM1* or *LHP1-GFP* demonstrated that *UPAT* is able to interact with  
322 UHRF1, as well as with VIM1 and LHP1 in plant cells (**Figure 6B-C**).

323 We thus assessed if the constitutive expression of *UPAT* or *APOLO* could modulate VIM1  
324 and LHP1 binding to *YUC2* promoter. CHIP-qPCR analyses performed in WT, *OE APOLO-1* and *OE*  
325 *UPAT* Arabidopsis stable lines transiently transformed or not with *GFP-VIM1* (**Supplementary**  
326 **Figure 1B**), revealed that both *APOLO* and *UPAT* over-expression precludes the interaction of VIM1  
327 and LHP1 with *YUC2* promoter (**Figure 6D-E**). Furthermore, *UPAT* constitutive expression in stable  
328 Arabidopsis seedlings resulted in decreased transcript levels of *YUC2* (**Supplementary Figure 11A-**  
329 **B**). Altogether, our results revealed a functional interaction between sequence-unrelated long

330 noncoding transcripts and key epigenetic regulators, which is likely conserved across kingdoms  
331 (Figure 6F for a model in plants).

332

## 333 DISCUSSION

### 334 Epigenetic transcriptional reprogramming in the thermomorphogenic response

335 When plants are exposed to warmer nonstressful average temperatures, some organs  
336 grow and develop at a faster rate without affecting their final dimensions, whereas others suffer  
337 morphological or developmental changes. The latest response is known as thermomorphogenesis  
338 and includes petiole elongation, leaf hyponasty and auxin-dependent hypocotyl elongation (Gray  
339 et al., 1998; Casal and Balasubramanian, 2019; Bellstaedt et al., 2019). These modifications of the  
340 plant architecture rely on a deep transcriptional reprogramming determined by dynamic changes  
341 of chromatin organization (Kumar and Wigge, 2010; Cortijo et al., 2017; Pajoro et al., 2017; Steffen  
342 and Staiger, 2017; Susila et al., 2018; Tasset et al., 2018).

343 A strong correlation between temperature and DNA methylation was first established in  
344 Swedish *A. thaliana* accessions, where higher levels of CpHpH methylation were observed in plants  
345 grown at 16°C compared to 10°C (Dubin et al., 2015; Kawakatsu et al., 2016). Interestingly, CpHpH  
346 methylation is conjointly regulated by CMT2 and the RdDM pathway (Stroud et al., 2013, 2014;  
347 Zemach et al., 2013) and both have been involved in the heat response. It was shown that  
348 *cmt2* mutants are more tolerant to heat-stress (Shen et al., 2014) and that the heat-stress  
349 response relies on the integrity of the RdDM pathway (Popova et al., 2013; Naydenov et al., 2015).  
350 In agreement, we observed that *cmt2* mutants displayed a slight but significantly increased  
351 response to warm temperatures in contrast to RdDM mutants exhibiting hypocotyl elongation  
352 defects. In addition, we observed that *met1* mutants exhibited the same developmental  
353 phenotype as RdDM mutants. Accordingly, it was demonstrated that *met1* knockout causes a loss  
354 of DNA methylation, a global loss of Pol V at its normal locations and a Pol V redistribution to sites  
355 that become hypermethylated (Johnson et al., 2014). Furthermore, we observed a reduction in  
356 CpHpH methylation at the *YUC2* promoter in the *vim1-3* mutant, linking the canonical CpG-related  
357 machinery with the RdDM pathway.

358 Importantly, *met1* was also shown to suffer H3K9 hypermethylation at PcG target genes  
359 and a redistribution of H3K27me3 to transposons (Deleris et al., 2012), hinting at a relation  
360 between DNA methylation and PRC-dependent histone modifications. Consistently, we uncovered

361 here a new molecular link between the DNA methylation-associated protein VIM1 and the  
362 H3K27me3-related protein LHP1, which can interact together and with the lncRNA *APOLO*. An  
363 indirect relation between LHP1 and VIM1 had already been described through the histone  
364 methyltransferase NtSET1, a common interactor. It was first shown in *Nicotiana tabacum* that  
365 NtSET1 directly interacts with LHP1 (Yu et al., 2004) and it was then reported that NtSET1 can bind  
366 to AtVIM1 *in planta* (Liu et al., 2007), although no link was established between LHP1 and DNA  
367 methylation.

368         Although VIM1, VIM2 and VIM3 have been reported to function redundantly to mediate  
369 epigenetic transcriptional silencing (Woo et al., 2008), we showed here that *vim1* single mutants  
370 exhibit particular molecular and associated physiological phenotypes in response to warmth. We  
371 related the hypocotyl elongation defect observed in *vim1* to the transcriptional activation of the  
372 *YUC2* gene (Sakata et al., 2010; Mashiguchi et al., 2011). *YUC2* regulation in response to heat was  
373 first observed in flowers, where heat shock (33°C) repressed its expression and caused plant male  
374 sterility (Sakata et al., 2010). At milder temperatures (27°C), *YUC2* transcript levels were reported  
375 to increase, in correlation with the demethylation of *YUC2* proximal promoter region targeted by  
376 RdDM (Gyula et al., 2018), suggesting that cytosine methylation at the *YUC2* regulatory region is  
377 critical for the control of its expression in response to heat. In addition to DNA methylation, a  
378 correlation was established between the deposition of H3K27me3 and genes exhibiting either high  
379 or low transcription rates under warm temperatures (Sidaway-Lee et al., 2014). Consistently, we  
380 observed that the *lhp1* mutant displayed impaired hypocotyl elongation and showed no activation  
381 of *YUC2* at 29°C. Interestingly, LHP1 was previously reported to exert a positive role in the  
382 regulation of *YUCCA* genes under standard growth conditions. Indeed, *YUC5*, *YUC8* and *YUC9*  
383 displayed an abnormal transcriptional activity in the *lhp1* mutant (Rizzardi et al., 2011), correlating  
384 with a reduction of H3K27me3, as revealed by genome-wide approaches (Veluchamy et al.,  
385 2016). In addition, LHP1 was found to localize to *YUC2*, whose expression was not affected by  
386 the *lhp1* mutation at this developmental stage, in an auxin-dependent fashion (Rizzardi et al.,  
387 2011).

388         It was recently shown in *Arabidopsis* that the 5' untranslated region of several mRNAs may  
389 adopt alternative hairpin conformations under warm cycling daytime temperatures, modulating  
390 translation efficiency. It was proposed that mRNA thermoswitches enhancing protein synthesis  
391 may constitute a conserved mechanism enabling plants to respond rapidly to high temperatures  
392 (Chung et al., 2020). In contrast, the potential role of lncRNAs as thermosensors in higher

393 organisms remains unexplored. In this work, we showed that *APOLO* participates in the  
394 thermomorphogenic response in Arabidopsis. Interestingly, *APOLO* transcriptional accumulation  
395 increases in response to cold (Moison et al., 2021), whereas we showed here that it decreases  
396 under warm temperatures. Further research will be needed to uncover the effect of temperature  
397 on the structure of *APOLO* and other lncRNAs that determines their molecular role and  
398 contributes to the plant adaptation to environmental constraints.

399

#### 400 **R-loop-associated long noncoding RNAs modulate DNA methylation and histone modifications**

401 RNA-DNA hybrids (R-loops) have been identified as important regulators of chromatin  
402 conformation and gene transcriptional regulation (Fazzio, 2016; Crossley et al., 2019). *APOLO* is  
403 known to recognize its multiple *trans* targets by sequence complementarity and R-loop formation.  
404 Upon interaction, it decoys LHP1, shaping local chromatin 3D conformation and subsequently  
405 modulating gene transcriptional activity (Ariel et al., 2020). Consistently, we showed here that  
406 *APOLO* recognizes *YUC2* gene body through the formation of R-loops.

407 Interestingly, *APOLO* additionally interacts with VIM1 to co-regulate DNA methylation at  
408 the *YUC2* promoter, mediating *YUC2* transcriptional response to warm temperatures. Although the  
409 involvement of RNA Pol II-lncRNAs in the regulation of DNA methylation in plants remains largely  
410 unknown, previous reports have linked lncRNA activity to promoter methylation in mammals,  
411 through the interaction with protein partners (Chalei et al., 2014) or the formation of R-loops  
412 (Arab et al., 2014, 2019). Notably, it was reported that DNMT1-interacting lncRNAs can promote  
413 or block local DNA methylation (Mohammad et al., 2010; Di Ruscio et al., 2013; Chalei et al., 2014),  
414 whereas it was proposed that R-loops formed by nascent transcripts can preclude DNA  
415 methylation from promoter regions by repelling DNA methyltransferases (Ginno et al., 2012;  
416 Grunseich et al., 2018).

417 In addition to DNA methylation, a link between R-loops and the activity of PRC complexes  
418 has also been proposed. In mammals, it was shown that R-loops can form at a subset of PcG target  
419 genes, resulting in alternative regulatory outputs depending on the interplay between the DNA-  
420 RNA duplex and PRC components (Skourti-Stathaki et al., 2019). In this work, we showed that the  
421 over-accumulation of *APOLO* can titer VIM1 and LHP1 away from the *YUC2* promoter region. It is  
422 thus tempting to hypothesize that R-loops formed by *APOLO* at the *YUC2* locus stoichiometrically  
423 modulate VIM1 and LHP1 recruitment to DNA in response to changes in ambient temperature. At  
424 23°C, a precise amount of *APOLO* over the *YUC2* locus may guide the LHP1-VIM1 complex to the

425 target region. In contrast, at 29°C *APOLO* transcript levels decrease, hindering VIM1 and LHP1  
426 efficient recognition of *YUC2*. On the other hand, over-accumulation of *APOLO* can decoy LHP1  
427 and VIM1 away from the *YUC2* locus, explaining the similar hypocotyl elongation phenotypes of  
428 OE *APOLO*, *vim1* and *lhp1*, as well as the similar DNA methylation levels observed at the *YUC2*  
429 promoter in these three backgrounds. The re-methylation of the *YUC2* promoter in OE *APOLO*,  
430 *vim1* and *lhp1* at warm temperatures, in contrast to WT, might be due to altered RdDM activity  
431 when any component of the regulatory complex is affected. Thereby, we propose that *APOLO*  
432 functions as a key mediator of the PRC and DNA methylation machineries, hinting at a  
433 stoichiometric factor fine-tuning the activity of R-loops-related lncRNAs.

434

### 435 **Long noncoding RNAs as key mediators of the Polycomb and DNA methylation machineries**

436 Connections between Polycomb and DNA methylation machineries have been reported in  
437 few studies in mammals. DNMT1 was shown to directly interact with HP1 to mediate silencing of  
438 euchromatic genes (Smallwood et al., 2007) and its enzymatic activity is also stimulated by direct  
439 interaction with UHRF1 (Nady et al., 2011; Rothbart et al., 2012; Nishiyama et al., 2013;  
440 Bashtrykov et al., 2014; Zhao et al., 2016). Interestingly, HP1 and UHRF1 have been shown to co-  
441 exist on chromatin (Rose and Klose, 2014), although their direct interaction has not been proven.  
442 Here, we showed that LHP1 and VIM1 interact *in planta*, suggesting that a direct interaction  
443 between their homologs HP1 and UHRF1 may occur in mammals. As in mammals, it was shown in  
444 Arabidopsis that VIM1 recruits MET1 to hemi-methylated DNA (Feng et al., 2010; Yao et al., 2012;  
445 Kim et al., 2014; Shook and Richards, 2014), hinting at the existence of analogous complexes  
446 formed by MET1/DNMT1, VIM1/UHRF1 and LHP1/HP1 in plants and animals.

447 Remarkably, DNMT1, UHRF1 and HP1 were all shown to interact with coding or long  
448 noncoding RNAs (Piacentini et al., 2009; Di Ruscio et al., 2013; Taniue et al., 2016), whereas in  
449 plants only LHP1 was shown to bind to RNAs *in vitro* (Berry et al., 2017) and *in vivo* (Ariel et al.,  
450 2014, 2020). Notably, UHRF1 can interact with the lncRNA *UPAT* whose scaffold function prevents  
451 UHRF1 from ubiquitination and proteasomal degradation (Taniue et al., 2016). Knockdown of  
452 *UPAT* results in a drastic decrease in the levels of DNMT1 protein and a reduction of  
453 hemimethylation at its target genes (Taniue et al., 2016). Here, we showed that *UPAT* can interact  
454 with VIM1 and LHP1 in plant cells, and high amounts of *UPAT* can decoy VIM1 and LHP1 from  
455 *YUC2* promoter, as the sequence-unrelated transcript *APOLO*.

456           Although a global anti-correlation is observed in the Arabidopsis genome between DNA  
457 methylation and H3K27me3 deposition, characterizing heterochromatic and euchromatic regions  
458 respectively (Johnson et al., 2007; Mathieu et al., 2005; Deleris et al., 2012; Antunez-Sanchez et  
459 al., 2020), DNA hypomethylation was associated to H3K27me3 reduction at specific genes in *met1*  
460 and *vim1/2/3* mutants (Deleris et al., 2012; Kim et al., 2014b). Consistently, our results indicate  
461 that *APOLO* lncRNA interacts with LHP1 and VIM1 to regulate *YUC2*, constituting a lncRNA-  
462 mediated non-canonical cooperative interaction between Polycomb and DNA methylation  
463 machineries. Although other lncRNAs have been linked to thermomorphogenesis or light  
464 dependent hypocotyl elongation, their mechanisms of action or target recognition remain  
465 unknown (Wang et al., 2014; Severing et al., 2018). Considering that the sequence-unrelated  
466 lncRNA *UPAT* mimicked the action of *APOLO* over the chromatin-binding capacity of the VIM1-  
467 LHP1 complex, it is likely that additional yet-uncovered lncRNAs exert a similar role as *APOLO* in  
468 Arabidopsis.

469           Altogether, our results hint at a mechanism possibly conserved across kingdoms, which  
470 may rely on the structure rather than the sequence of long noncoding transcripts. A deeper  
471 knowledge about the molecular basis behind lncRNA-related regulatory mechanisms will likely  
472 push back the frontiers of human therapeutics and will allow the design of innovative strategies  
473 for sustainable agriculture in a climate change context.

474

## 475 **METHODS**

476

### 477 **Data availability**

478           RNA-sequencing data have been deposited in GEO with the accession code XXX. Bisulfite-  
479 sequencing data have been deposited in the European Nucleotide Archive (ENA) under project  
480 XXX.

481

### 482 **Plant material and growth conditions**

483           All the *Arabidopsis thaliana* lines used were in the Columbia-0 (Col-0) background. *vim1-2*  
484 (SALK\_050903) and *vim1-3* (SALK\_149277c) seeds were obtained from the Arabidopsis Biological  
485 Resource Center (<http://www.arabidopsis.org/>). Mutant plants were genotyped by PCR using  
486 specific primers to amplify the endogenous locus and T-DNA borders (primers used are listed in  
487 Supplementary Table 4). *VIM1* and *UPAT* over-expression (OE) transgenic plants were generated



488 through *Agrobacterium tumefaciens* (strain EHA105)-mediated transformation (Clough and Bent,  
489 2008). Two independent lines of transformants harboring *GFP-VIM1* or *UPAT* were selected on  
490 MS/2 medium supplemented with kanamycin (40µg/mL). *VIM1* expression levels were measured  
491 by RT-qPCR (primers used are listed in Supplementary Table 4).

492 Seeds were surface-sterilized by treatments with 70% EtOH and 5% hypochlorite-1% SDS,  
493 washed and stratified at 4°C for 2 days to obtain homogeneous germination. Seedlings were  
494 grown at 23°C or 29°C on solid half-strength Murashige and Skoog (MS/2) medium (Duchefa),  
495 under long day conditions (16h light, 95µE.m<sup>-2</sup>.sec<sup>-1</sup>/8h dark). For phenotypic characterization of  
496 hypocotyl elongation, seedlings were grown for 3h at 23°C and transferred to 29°C or maintained  
497 at 23°C for 4 days. Hypocotyl lengths were measured using the ImageJ software. For RNA-  
498 sequencing, chromatin immunoprecipitation and methylated DNA immunoprecipitation assays  
499 performed in Arabidopsis stable lines, seedlings were grown for 4 days at 23°C and transferred to  
500 29°C or maintained at 23°C for 6h. For chromatin isolation by RNA purification and DNA-RNA  
501 Immunoprecipitation, seedlings were grown for 11 days at 23°C.

502

### 503 Cloning procedures

504 The entire coding region of *VIM1* (AT1G57820), *VIM1* derivatives (PHD/RING1, SRA/RING2,  
505 SRA, RING2; Woo et al., 2007), *LHP1* (AT5G17690) and the lncRNA *UPAT* (Taniue et al., 2016) were  
506 amplified by PCR on genomic DNA or pBluescript:UPAT vector (Taniue et al., 2016) respectively,  
507 and cloned into the Gateway entry vector pENTR/D-TOPO (Invitrogen). Entry clones were  
508 recombined by Gateway technology (LR reaction) into the pK7WGF2, pK7FWG2 or pK7WG2  
509 vectors containing respectively a p35S-GFP-GW, a p35S-GW-GFP or a p35S-GW cassette  
510 (<http://www.psb.ugent.be/gateway/index.php>). pENTR/VIM1, pENTR/SRA/RING2 and  
511 pENTR223/LHP1 were recombined by LR reaction into the pGPTVII.Bar-C/NYFP vectors containing  
512 respectively a p35S-CYFP or a p35S-NYFP cassette (<http://www.psb.ugent.be/gateway/index.php>).  
513 The spacer of *VIM1* and the entire coding region of *UHRF1* were amplified by PCR on cDNA and  
514 pGE-HIS-MBP *UHRF1* plasmid respectively, and cloned into the GreenGate entry vector pGGC000.  
515 Destination vectors were constructed associating modules: 35S promoter, GFP, Ubiquitin 10  
516 terminator and pNOS:BastaR,tNOS, according to Lampropoulos et al. (2013). All Gateway  
517 constructs were subsequently transformed into the *A. tumefaciens* strain EHA105 and GreenGate  
518 constructs into the *A. tumefaciens* strain ASE containing a pSOUP helper plasmid.

519

## 520 **Transient expression and confocal microscopy**

521 Leaves of *Nicotiana benthamiana* were transiently transformed as described in Waadt and  
522 Kudla (2008). For RNA immunoprecipitation, *GFP-VIM1* or derivatives (*GFP-PHD/RING1*, *GFP-*  
523 *SRA/RING2*, *GFP-SRA*, *GFP-RING2* and *GFP-Spacer*) were co-transformed with p35S-*APOLO* (Ariel et  
524 al., 2020), or *GFP-UHRF1*, *GFP-VIM1* or *LHP1-GFP* were co-transformed with p35S-*UPAT*. For sub-  
525 cellular localization, *VIM1* protein or derivatives were co-transformed or not with p35S-*APOLO*.  
526 For bimolecular fluorescence complementation, *YFPC-VIM1* or *YFPC-SRA/RING2* were co-  
527 transformed with *YFPN-LHP1*. Leaves were harvested or cells were analyzed 2 days after  
528 infiltration using a Zeiss confocal microscope equipped with Plan-Apochromat 10x/NA 0,45/M27  
529 or Plan-Apochromat 20x/NA 0,8/r M27 US-VIS-IR dry lens. eGFP and eYFP fluorescence was  
530 excited with 488 nm and 514 nm argon laser lines and emission recorded between 490nm and  
531 580nm and 520nm and 600nm respectively. Image acquisitions and analyses were performed on  
532 the IPS2 Imaging Facility.

533 Leaves of 3-week-old *Arabidopsis thaliana* were transiently transformed as described in  
534 Zhang et al., 2020. Transformation with *GFP-VIM1* was carried out in leaves > 0.5 cm in length, in  
535 10 to 15 plants per genotype (WT, OE *APOLO-1* and OE *UPAT*). Leaves were crosslinked and  
536 harvested (for ChIP) or cells were analyzed 3 days after infiltration, using a Leica TCS SP8 confocal  
537 laser scanning microscope. eGFP was excited at 488 nm (intensity=8%) and emission recorded  
538 between 495nm and 530nm for GFP and 610nm and 670nm (gain 650) for chlorophyll  
539 fluorescence. Images were processed using the Fiji software (Schindelin et al., 2012).

540

## 541 **Chromatin isolation by RNA purification and Mass spectrometry**

542 ChIRP-qPCR was performed as previously described (Ariel et al., 2014, 2020).  
543 Formaldehyde-crosslinked seedlings were ground and nuclei were isolated and sonicated using a  
544 water bath Bioruptor Pico (Diagenode; 30s on/ 30s off pulses, at high intensity for 10 cycles).  
545 *APOLO*-associated chromatin was purified using 100pmol of two independent sets of primers  
546 (ODD and EVEN) and a negative control (primers matching the LacZ RNA), respectively (Ariel et al.,  
547 2014, 2020). Primers used are listed in Supplementary Table 4.

548 A method adapted from the ChIRP protocol (Chu et al., 2012) was developed to allow  
549 identification of plant nuclear proteins bound to specific lncRNAs, as described in Rigo et al., 2020.  
550 Briefly, plants were *in vivo* crosslinked and cell nuclei were purified and extracted through  
551 sonication. The resulting supernatant was hybridized against biotinylated complementary

552 oligonucleotides that tile the lncRNA of interest and putative lncRNA-containing protein  
553 complexes were isolated using magnetic streptavidin beads. Co-purified ribonucleoprotein  
554 complexes were eluted and used to purify RNA or proteins, which were later subject to  
555 downstream assays for identification and quantification.

#### 556 *Crosslinking and ribonucleoprotein complexes purification*

557 For protein extraction, approximately 250 g of 7-day-old Col-0 plants grown on solid half-  
558 strength MS medium was irradiated three times with UV using a CROSSLINKERCL-508 (Uvitec) at  
559 0.400 J/ cm<sup>2</sup>. For RNA extraction, 10g of 7-day-old Col-0 plants grown on solid MS/2 medium was  
560 crosslinked under vacuum for 15min with 37ml of 1% (v/v) formaldehyde. The reaction was  
561 stopped by adding 2.5ml of 2M glycine and seedlings were rinsed with Milli-Q purified water. For  
562 both crosslinking methods, 6g of the fixed material was ground in liquid nitrogen (representing 15  
563 ml of plant material ground to fine dust) and added to 50ml tubes with 25 ml of extraction buffer  
564 1– (the nuclei were prepared starting with 30 tubes; buffer 1: 10mM Tris–HCl pH8, 0.4M sucrose,  
565 10mM MgCl<sub>2</sub>, 5mM β-mercaptoethanol, 1ml/30g of sample powder Plant Protease Inhibitor Sigma  
566 P9599). The solution was then filtered through Miracloth membrane (Sefar) into a new tube and  
567 5ml of extraction buffer 2 (10mM Tris–HCl pH8, 0.25M sucrose, 10mM MgCl<sub>2</sub>, 5mM β-  
568 mercaptoethanol, 1%Triton X-100, 10 μl 100 μl PMSF) was added. The solution was then  
569 centrifuged, the supernatant discarded and the pellet was resuspended in 500 μl of extraction  
570 buffer 3 (10mM Tris–HCl pH8, 1.7M sucrose, 2mM MgCl<sub>2</sub>, 5mM β-mercaptoethanol, 0.15% Triton  
571 X-100, 50μl protease inhibitor) and layered on top of 600 μl of fresh extraction buffer 3 in a new  
572 tube. After centrifugation at 13000rpm for 2min at 4°C to pellet the nuclei, the supernatant was  
573 discarded and the pellet resuspended in 300μl of nuclei lysis buffer (50mM Tris–HCl pH7, 1% SDS,  
574 10mM EDTA, 1mM DTT, 50μl protease inhibitor, 10μl RNase inhibitor per tube) to degrade nuclear  
575 membranes. Samples were sonicated three times in refrigerated Bioruptor Plus (Diagenode), 30  
576 cycles 30sec ON/30sec OFF in a Diagenode TPX microtube M-50001. After centrifugation, the  
577 supernatant was transferred to a new tube and diluted two times volume in hybridization buffer  
578 (50mM Tris–HCl pH7, 750 mM NaCl, 1% SDS, 15% formamide, 1mM DTT, 50μl protease inhibitor,  
579 10μl RNase inhibitor). One hundred pmol of probes against *APOLO* (ODD and EVEN set of probes,  
580 Ariel et al., 2014, 2020) and the corresponding negative set against LacZ were added to samples  
581 and incubated 4h at 50°C in a thermocycler. Samples were transferred to tubes containing  
582 Dynabeads- Streptavidin C1 (Thermo Fisher Scientific) and incubated 1h at 50°C. Then, samples  
583 were placed on a magnetic field and washed three times with 1ml of wash buffer (2× SSC, 0.5%

584 SDS, 1 mM DTT, 100 $\mu$ l protease inhibitor). Protein purification samples for protein extraction were  
585 DNase-treated according to the manufacturer (Thermo Scientific). After addition of 1.8ml of TCA-  
586 acetone (5ml 6.1N TCA + 45ml acetone + 35 $\mu$ l  $\beta$ -mercaptoethanol), samples were incubated  
587 overnight at -80°C. After centrifugation at 20000rpm for 20min at 4°C, the supernatant was  
588 discarded and 1.8ml of acetone wash buffer (120ml acetone, 84 $\mu$ l  $\beta$ -mercaptoethanol) was added  
589 to the samples. Then, samples were incubated 1h at -20°C and centrifuged again at 20000 rpm for  
590 20min at 4°C. The supernatant was discarded, and the dry pellet was used for mass spectrometry  
591 analyses.

592

### 593 **DNA-RNA Immunoprecipitation**

594 DNA-RNA Immunoprecipitation (DRIP) was performed as described in Ariel et al., 2020.  
595 Non-crosslinked seedlings were used for nuclei purification and samples were sonicated using a  
596 water bath Bioruptor Pico (Diagenode; 30s on/ 30s off pulses, at high intensity for 4 cycles).  
597 Chromatin samples were incubated with 50 ml of washed Protein G Dynabeads pre-coated with  
598 1mg of S9.6 antibody (Millipore MABE1095) for 16h at 4°C. Samples treated with RNaseH  
599 (Invitrogen) for 2h at 37°C were used for DRIP in parallel as a negative control. After washing, DNA  
600 was recovered for qPCR over R-loop related loci (primers used are listed in Supplementary Table  
601 4).

602

### 603 **RNA-sequencing analysis**

604 Total RNA was prepared from 4-day-old *A. thaliana* wild-type (WT), OE *APOLO-1* (Ariel et  
605 al., 2014) and *vim1-3* seedlings using the QIAGEN RNeasy plant mini kit and treated with DNase  
606 (Fermentas). Three independent biological replicates were produced per genotype. After RNA  
607 extraction, libraries were constructed using the Tru-Seq Stranded mRNA Sample Prep kit  
608 (Illumina®). Sequencing was carried out at the IPS2. The Illumina NextSeq500 technology was used  
609 to perform 75-bp sequencing. A minimum of 15 million of single end reads by sample was  
610 generated. RNA-seq preprocessing included trimming library adapters and quality controls were  
611 performed with Trimmomatic (Bolger et al., 2014). Paired end reads with Phred Quality Score  
612 Qscore > 20 and read length > 30 bases were kept, and ribosomal RNA sequences were removed  
613 with SortMeRNA (Kopylova et al., 2012). Processed reads were aligned using STAR with the  
614 following arguments: `--alignIntronMin 20 --alignIntronMax 3000 --outSAMtype BAM`  
615 `SortedByCoordinate --alignIntronMax 3000 --outSAMtype BAM SortedByCoordinate --`

616 alignIntronMax 3000 --outSAMtype BAM SortedByCoordinate. Read overlapping exons per genes  
617 were counted using the featureCounts of the subreads package using the GTF annotation files  
618 from the Araport11 project (Cheng et al., 2017). Significance of differential gene expression was  
619 estimated using DESeq2 (Love et al., 2014) and the FDR correction of the p-value was used during  
620 pairwise comparison between genotypes. A gene was declared differentially expressed if its  
621 adjusted p-value (FDR) was < 0.01. Heatmap was generated using log2 transformed fold change  
622 values compared WT 23°C and computed with the pheatmap R (Kolde, 2019).

623

#### 624 **Bisulfite-sequencing analysis**

625 Genomic DNA (1µg) was prepared from 4-day-old WT and *vim1-3*, or 14-day-old WT and  
626 *lhp1* seedlings, respectively. For WT vs. *vim1-3*, bisulfite conversion, BS-seq libraries and  
627 sequencing (paired-end 100 nt reads) were performed by BGI Tech Solutions (Hong Kong). For WT  
628 vs. *lhp1*, bisulfite conversion was performed with the Premium Whole Genome Bisulfite  
629 Sequencing kit (Diagenode) and libraries (paired-end 100 nt reads) were sequenced at the IPS2  
630 platform. Adapter and low-quality sequences were trimmed using Trimming Galore v0.3.3.  
631 Mapping was performed on TAIR10 genome annotation using Bismark v0.14.2 (Krueger and  
632 Andrews, 2011) and the parameters: --bowtie2, -N 1, -p 3 (alignment); --ignore 5 --ignore\_r2 5 --  
633 ignore\_3prime\_r2 1 (methylation extractor). Only uniquely mapping reads were retained. The  
634 methylKit package v0.9.4 (Akalin et al., 2012) was used to calculate differential methylation in 100  
635 bp bp non-overlapping windows (DMRs). Significance of calculated differences was determined  
636 using Fisher's exact test and Benjamin-Hochberg (BH) adjustment of p-values (FDR<0.05) and  
637 methylation difference cutoffs of 40% for CG, 20% for CHG and 20% for CHH. Differentially  
638 methylated windows within 100bp or 20bp of each other were merged to form larger DMRs. Only  
639 100bp windows with at least six cytosines covered by a minimum of 6 (CG and CHG) and 10 (CHH)  
640 reads in all libraries were considered.

641

#### 642 **RNA immunoprecipitation assay**

643 RNA immunoprecipitation (RIP) assays were performed on transiently transformed *N.*  
644 *benthamiana* leaves as described in Sorenson and Bailey-Serres (2015), or in 2-week-old *A.*  
645 *thaliana* OE *VIM1.1* seedlings as described in Bardou et al. (2014), using anti GFP (Abcam ab290)  
646 and anti-IgG (Abcam ab6702). RIP was performed using Invitrogen Protein A Dynabeads.  
647 Precipitated RNAs were prepared using TRI Reagent (Sigma-Aldrich), treated with DNase

648 (Fermentas) and subjected to RT-qPCR (High Capacity cDNA Reverse Transcription Kit (Thermo);  
649 primers used are listed in Supplementary Table 4). Total RNAs were processed in parallel and  
650 considered as the input sample.

651

#### 652 **Chromatin immunoprecipitation assay**

653 Chromatin immunoprecipitation (ChIP) assays were performed using anti GFP (Abcam  
654 ab290), anti LHP1 (Covalab pab0923-P), anti H3K27me3 (Diagenode pab-195-050) and anti-IgG  
655 (Abcam ab6702), as described in Ariel et al., 2020. Crosslinked chromatin was sonicated using a  
656 water bath Bioruptor Pico (Diagenode; 30sec ON/30sec OFF pulses; 10 cycles; high intensity). ChIP  
657 was performed using Invitrogen Protein A Dynabeads. Precipitated DNA was recovered using  
658 Phenol:Chloroform:Isoamlic Acid (25:24:1; Sigma) and subjected to RT-qPCR (primers used are  
659 listed in Supplementary Table 4). Untreated sonicated chromatin was processed in parallel and  
660 considered as the input sample.

661

#### 662 **Methylated DNA immunoprecipitation**

663 Methylated DNA immunoprecipitation (MedIP) assays were performed using anti 5-mC  
664 (Diagenode Mab-081-100) and anti-IgG (Abcam ab6702), as described in Nagymihály et al. (2017).  
665 Genomic DNA (1µg) was sonicated using a water bath Bioruptor Pico (Diagenode; 30s on/30s off  
666 pulses; 4 cycles; high intensity). MedIP was performed using Invitrogen Protein G Dynabeads.  
667 Precipitated DNA was recovered using Phenol:Chloroform:Isoamlic Acid (25:24:1; Sigma) and  
668 subjected to RT-qPCR (primers used are listed in Supplementary Table 4). Untreated sonicated  
669 genomic DNA was processed in parallel and considered as the input sample.

670

#### 671 **RT-qPCR**

672 RT-qPCR were performed using the LightCycler 480 SYBR Green I Master Kit on a StepOne  
673 Plus apparatus (Applied Biosystems) using standard protocols (40 to 45 cycles, 60°C annealing).  
674 *PP2A* (AT1G13320) was used for normalization (primers used are listed in Supplementary Table 4).

675

#### 676 **Histochemical staining**

677 Four-day-old *pYUCCA2:GUS* transgenic seedlings (Cheng et al., 2006) grown at 23°C or 29°C  
678 were infiltrated with GUS staining solution (0.1M Phosphate buffer pH 7.5; 100mM K<sub>3</sub>Fe(CN)<sub>6</sub>;  
679 100mM K<sub>4</sub>Fe(CN)<sub>6</sub>; 20% Triton X-100; 50mM X-Gluc) under vacuum and subsequently incubated at

680 37°C for 12h. Stained tissues were cleared in 70% EtOH for 24h at 37°C and observed under a light  
681 microscope.

682

### 683 **Statistical analyses**

684 Statistical analyses were performed with non-parametric tests, Mann–Whitney when n=2  
685 independent samples, and Kruskal- Wallis test when n>2 independent samples.

686

### 687 **Acknowledgments**

688 We thank Y. Zaho (University of California) for *yuc2* and *pYUC2:GUS* Arabidopsis seeds; SB.  
689 Rothbart (Van Andel Research Institute) for the pGE-HIS-MBP UHRF1 clone; T. Akiyama (University  
690 of Tokio) for the *pBluescript:UPAT* clone. This project was financially supported by grants from  
691 Agencia Nacional de Promoción Científica y Tecnológica (PICT), Universidad Nacional del Litoral  
692 (CAI+D) and Fima Leloir Award (Argentina); International Associated Lab NOCOSYM (CNRS-  
693 CONICET); the Centre National de la Recherche Scientifique (MOMENTUM program, to LQ); IPS2  
694 benefits from the support of Saclay Plant Sciences-SPS (ANR-17-EUR-0007). LL, DG and FA are  
695 members of CONICET. CFF, MFL, MM, and LF are fellows of the same institution.

696

### 697 **Author contributions**

698 FA and MC conceived the project; FA, CFF, MC, LQ and MB designed the experiments; CFF, AC,  
699 JSRP, DL and FA performed the experiments; LQ, TB and LL analyzed the data; MFL, MM, LF, DG  
700 and MB contributed materials and methods; CFF and FA wrote the paper.

701

### 702 **Declaration of interests**

703 The authors declare no competing interests.

704

### 705 **References**

706 Akalin, A., Kormaksson, M., Li, S., Garrett-Bakelman, F.E., Figueroa, M.E., Melnick, A., and Mason,  
707 C.E. (2012). MethylKit: a comprehensive R package for the analysis of genome-wide DNA  
708 methylation profiles. *Genome Biol.* 13.  
709 Antunez-Sanchez, J., Naish, M., Ramirez-Prado, J.S., Ohno, S., Huang, Y., Dawson, A., Opassathian,  
710 K., Manza-Mianza, D., Ariel, F., Raynaud, C., et al. (2020). A new role for histone demethylases in  
711 the maintenance of plant genome integrity. *Elife* 9, 1–32.

712 Arab, K., Park, Y.J., Lindroth, A.M., Schäfer, A., Oakes, C., Weichenhan, D., Lukanova, A., Lundin, E.,  
713 Risch, A., Meister, M., et al. (2014). Long noncoding RNA TARID directs demethylation and  
714 activation of the tumor suppressor TCF21 via GADD45A. *Mol. Cell* 55, 604–614.

715 Arab, K., Karaulanov, E., Musheev, M., Trnka, P., Schäfer, A., Grummt, I., and Niehrs, C. (2019).  
716 GADD45A binds R-loops and recruits TET1 to CpG island promoters. *Nat. Genet.* 51, 217–223.

717 Ariel, F., Jegu, T., Latrasse, D., Romero-Barrios, N., Christ, A., Benhamed, M., and Crespi, M. (2014).  
718 Noncoding transcription by alternative rna polymerases dynamically regulates an auxin-driven  
719 chromatin loop. *Mol. Cell* 55, 383–396.

720 Ariel, F., Lucero, L., Christ, A., Mammarella, M.F., Jegu, T., Veluchamy, A., Mariappan, K., Latrasse,  
721 D., Blein, T., Liu, C., et al. (2020). R-Loop Mediated trans Action of the APOLO Long Noncoding  
722 RNA. *Mol. Cell* 77, 1055-1065.e4.

723 Bardou, F., Ariel, F., Simpson, C.G., Romero-Barrios, N., Laporte, P., Balzergue, S., Brown, J.W.S.,  
724 and Crespi, M. (2014). Long Noncoding RNA Modulates Alternative Splicing Regulators in  
725 Arabidopsis. *Dev. Cell* 30, 166–176.

726 Bashtrykov, P., Jankevicius, G., Jurkowska, R.Z., Ragozin, S., and Jeltsch, A. (2014). The UHRF1  
727 protein stimulates the activity and specificity of the maintenance DNA methyltransferase DNMT1  
728 by an allosteric mechanism. *J. Biol. Chem.* 289, 4106–4115.

729 Bellstaedt, J., Trenner, J., Lippmann, R., Poeschl, Y., Zhang, X., Friml, J., Quint, M., and Delker, C.  
730 (2019). A mobile auxin signal connects temperature sensing in cotyledons with growth responses  
731 in hypocotyls. *Plant Physiol.* 180, 757–766.

732 Berry, S., Rosa, S., Howard, M., Bühler, M., and Dean, C. (2017). Disruption of an RNA-binding  
733 hinge region abolishes LHP1-mediated epigenetic repression. *Genes Dev.* 31, 2115–2120.

734 Bolger, A.M., Lohse, M., and Usadel, B. (2014). Trimmomatic: A flexible trimmer for Illumina  
735 sequence data. *Bioinformatics* 30, 2114–2120.

736 Bostick, M., Jong, K.K., Estève, P.O., Clark, A., Pradhan, S., and Jacobsen, S.E. (2007). UHRF1 plays a  
737 role in maintaining DNA methylation in mammalian cells. *Science* (80-. ). 317, 1760–1764.

738 Bronner, C., Alhosin, M., Hamiche, A., and Mousli, M. (2019). Coordinated dialogue between  
739 UHRF1 and DNMT1 to ensure faithful inheritance of methylated DNA patterns. *Genes (Basel).* 10.

740 Cao, X., and Jacobsen, S.E. (2002). Role of the Arabidopsis DRM methyltransferases in de novo  
741 DNA methylation and gene silencing. *Curr. Biol.* 12, 1138–1144.

742 Casal, J.J., and Balasubramanian, S. (2019). Thermomorphogenesis. *Annu. Rev. Plant Biol.* 70, 321–  
743 346.



744 Chalei, V., Sansom, S.N., Kong, L., Lee, S., Montiel, J.F., Vance, K.W., and Ponting, C.P. (2014). The  
745 long non-coding RNA Dali is an epigenetic regulator of neural differentiation. *Elife* 3, 1–24.

746 Cheng, C.-Y., Krishnakumar, V., Chan, A.P., Thibaud-Nissen, F., Schobel, S., and Town, C.D. (2017).  
747 Araport11: a complete reannotation of the *Arabidopsis thaliana* reference genome. *Plant J.* 89,  
748 789–804.

749 Cheng, Y., Dai, X., and Zhao, Y. (2006). Auxin biosynthesis by the YUCCA flavin monooxygenases  
750 controls the formation of floral organs and vascular tissues in *Arabidopsis*. *Genes Dev.* 20, 1790–  
751 1799.

752 Chu, C., Quinn, J., and Chang, H.Y. (2012). Chromatin isolation by RNA purification (ChIRP). *J. Vis.*  
753 *Exp.* 3912.

754 Chung, B.Y.W., Balcerowicz, M., Di Antonio, M., Jaeger, K.E., Geng, F., Franaszek, K., Marriott, P.,  
755 Brierley, I., Firth, A.E., and Wigge, P.A. (2020). An RNA thermoswitch regulates daytime growth in  
756 *Arabidopsis*. *Nat. Plants* 6, 522–532.

757 Clough, S.J., and Bent, A.F. (2008). Floral dip: A simplified method for *Agrobacterium*-mediated  
758 transformation of *Arabidopsis thaliana*. *Plant J.* 16, 735–743.

759 Cortijo, S., Charoensawan, V., Brestovitsky, A., Buning, R., Ravarani, C., Rhodes, D., van Noort, J.,  
760 Jaeger, K.E., and Wigge, P.A. (2017). Transcriptional Regulation of the Ambient Temperature  
761 Response by H2A.Z Nucleosomes and HSF1 Transcription Factors in *Arabidopsis*. *Mol. Plant* 10,  
762 1258–1273.

763 Crossley, M.P., Bocek, M., and Cimprich, K.A. (2019). R-Loops as Cellular Regulators and Genomic  
764 Threats. *Mol. Cell* 73, 398–411.

765 Cuerda-Gil, D., and Slotkin, R.K. (2016). Non-canonical RNA-directed DNA methylation. *Nat. Plants*  
766 2, 16163.

767 Deleris, A., Stroud, H., Bernatavichute, Y., Johnson, E., Klein, G., Schubert, D., and Jacobsen, S.E.  
768 (2012). Loss of the DNA Methyltransferase MET1 Induces H3K9 Hypermethylation at PcG Target  
769 Genes and Redistribution of H3K27 Trimethylation to Transposons in *Arabidopsis thaliana*. *PLoS*  
770 *Genet.* 8.

771 Doğan, E.S., and Liu, C. (2018). Three-dimensional chromatin packing and positioning of plant  
772 genomes. *Nat. Plants* 4, 521–529.

773 Du, J., Zhong, X., Bernatavichute, Y. V., Stroud, H., Feng, S., Caro, E., Vashisht, A.A., Terragni, J.,  
774 Chin, H.G., Tu, A., et al. (2012). Dual binding of chromomethylase domains to H3K9me2-containing  
775 nucleosomes directs DNA methylation in plants. *Cell* 151, 167–180.

776 Dubin, M.J., Zhang, P., Meng, D., Remigereau, M.S., Osborne, E.J., Casale, F.P., Drewe, P., Kahles,  
777 A., Jean, G., Vilhjálmsson, B., et al. (2015). DNA methylation in Arabidopsis has a genetic basis and  
778 shows evidence of local adaptation. *Elife* 4, e05255.

779 Ebbs, M.L., and Bender, J. (2006). Locus-specific control of DNA methylation by the Arabidopsis  
780 SUVH5 histone methyltransferase. *Plant Cell* 18, 1166–1176.

781 Fang, J., Cheng, J., Wang, J., Zhang, Q., Liu, M., Gong, R., Wang, P., Zhang, X., Feng, Y., Lan, W., et  
782 al. (2016). Hemi-methylated DNA opens a closed conformation of UHRF1 to facilitate its histone  
783 recognition. *Nat. Commun.* 7, 1–12.

784 Fazio, T.G. (2016). Regulation of chromatin structure and cell fate by R-loops. *Transcription* 7,  
785 121–126.

786 Feng, S., Cokus, S.J., Zhang, X., Chen, P.Y., Bostick, M., Goll, M.G., Hetzel, J., Jain, J., Strauss, S.H.,  
787 Halpern, M.E., et al. (2010). Conservation and divergence of methylation patterning in plants and  
788 animals. *Proc. Natl. Acad. Sci. U. S. A.* 107, 8689–8694.

789 Finnegan, E.J., Peacock, W.J., and Dennis, E.S. (1996). Reduced DNA methylation in Arabidopsis  
790 thaliana results in abnormal plant development. *Proc. Natl. Acad. Sci. U. S. A.* 93, 8449–8454.

791 Franklin, K.A., Lee, S.H., Patel, D., Kumar, S.V., Spartz, A.K., Gu, C., Ye, S., Yu, P., Breen, G., Cohen,  
792 J.D., et al. (2011). PHYTOCHROME-INTERACTING FACTOR 4 (PIF4) regulates auxin biosynthesis at  
793 high temperature. *Proc. Natl. Acad. Sci. U. S. A.* 108, 20231–20235.

794 Gaudin, V., Libault, M., Pouteau, S., Juul, T., Zhao, G., Lefebvre, D., and Grandjean, O. (2001).  
795 Mutations in LIKE HETEROCHROMATIN PROTEIN 1 affect flowering time and plant architecture in  
796 Arabidopsis. *Development* 128, 4847–4858.

797 Ginno, P.A., Lott, P.L., Christensen, H.C., Korf, I., and Chédin, F. (2012). R-Loop Formation Is a  
798 Distinctive Characteristic of Unmethylated Human CpG Island Promoters. *Mol. Cell* 45, 814–825.

799 Gray, W.M., Östin, A., Sandberg, G., Romano, C.P., and Estelle, M. (1998). High temperature  
800 promotes auxin-mediated hypocotyl elongation in Arabidopsis. *Proc. Natl. Acad. Sci. U. S. A.* 95,  
801 7197–7202.

802 Grunseich, C., Wang, I.X., Watts, J.A., Burdick, J.T., Guber, R.D., Zhu, Z., Bruzel, A., Lanman, T.,  
803 Chen, K., Schindler, A.B., et al. (2018). Senataxin Mutation Reveals How R-Loops Promote  
804 Transcription by Blocking DNA Methylation at Gene Promoters. *Mol. Cell* 69, 426-437.e7.

805 Gyula, P., Baksa, I., Tóth, T., Mohorianu, I., Dalmay, T., and Szittya, G. (2018). Ambient  
806 temperature regulates the expression of a small set of sRNAs influencing plant development  
807 through NF-YA2 and YUC2. *Plant Cell Environ.* 41, 2404–2417.

- 808 Henderson, I.R., and Jacobsen, S.E. (2007). Epigenetic inheritance in plants. *Nature* *447*, 418–424.
- 809 Hsieh, T.F., Hakim, O., Ohad, N., and Fischer, R.L. (2003). From flour to flower: How Polycomb  
810 group proteins influence multiple aspects of plant development. *Trends Plant Sci.* *8*, 439–445.
- 811 Huettel, B., Kanno, T., Daxinger, L., Bucher, E., van der Winden, J., Matzke, A.J.M., and Matzke, M.  
812 (2007). RNA-directed DNA methylation mediated by DRD1 and Pol IVb: A versatile pathway for  
813 transcriptional gene silencing in plants. *Biochim. Biophys. Acta - Gene Struct. Expr.* *1769*, 358–374.
- 814 Jaenisch, R., and Bird, A. (2003). Epigenetic regulation of gene expression: How the genome  
815 integrates intrinsic and environmental signals. *Nat. Genet.* *33*, 245–254.
- 816 Johnson, L.M., Bostick, M., Zhang, X., Kraft, E., Henderson, I., Callis, J., and Jacobsen, S.E. (2007).  
817 The SRA Methyl-Cytosine-Binding Domain Links DNA and Histone Methylation. *Curr. Biol.* *17*, 379–  
818 384.
- 819 Johnson, L.M., Du, J., Hale, C.J., Bischof, S., Feng, S., Chodavarapu, R.K., Zhong, X., Marson, G.,  
820 Pellegrini, M., Segal, D.J., et al. (2014). SRA/SET domain-containing proteins link RNA polymerase V  
821 occupancy to DNA methylation. *Nature* *507*, 124–128.
- 822 Kankel, M.W., Ramsey, D.E., Stokes, T.L., Flowers, S.K., Haag, J.R., Jeddloh, J.A., Riddle, N.C.,  
823 Verbsky, M.L., and Richards, E.J. (2003). Arabidopsis MET1 cytosine methyltransferase mutants.  
824 *Genetics* *163*, 1109–1122.
- 825 Kawakatsu, T., Huang, S. shan C., Jupe, F., Sasaki, E., Schmitz, R.J.J., Urich, M.A.A., Castanon, R.,  
826 Nery, J.R.R., Barragan, C., He, Y., et al. (2016). Epigenomic Diversity in a Global Collection of  
827 Arabidopsis thaliana Accessions. *Cell* *166*, 492–505.
- 828 Kim, J., Kim, J.H., Richards, E.J., Chung, K.M., and Woo, H.R. (2014a). Arabidopsis VIM proteins  
829 regulate epigenetic silencing by modulating DNA methylation and histone modification in  
830 cooperation with MET1. *Mol. Plant* *7*, 1470–1485.
- 831 Kim, S., Kim, D., Cho, S.W., Kim, J., and Kim, J.S. (2014b). Highly efficient RNA-guided genome  
832 editing in human cells via delivery of purified Cas9 ribonucleoproteins. *Genome Res.* *24*, 1012–  
833 1019.
- 834 Kim, S., Park, H.J., Cui, X., and Zhi, D. (2020). Collective effects of long-range DNA methylations  
835 predict gene expressions and estimate phenotypes in cancer. *Sci. Rep.* *10*, 1–12.
- 836 Kolde, R. (2019). pheatmap: Pretty Heatmaps version 1.0.12 from CRAN.
- 837 Kopylova, E., Noé, L., and Touzet, H. (2012). SortMeRNA: fast and accurate filtering of ribosomal  
838 RNAs in metatranscriptomic data. *Bioinformatics* *28*, 3211–3217.
- 839 Kraft, E., Bostick, M., Jacobsen, S.E., and Callis, J. (2008). ORTH/VIM proteins that regulate DNA

- 840 methylation are functional ubiquitin E3 ligases. *Plant J.* *56*, 704–715.
- 841 Krueger, F., and Andrews, S.R. (2011). Bismark: A flexible aligner and methylation caller for  
842 Bisulfite-Seq applications. *Bioinformatics* *27*, 1571–1572.
- 843 Kumar, S.V., and Wigge, P.A. (2010). H2A.Z-Containing Nucleosomes Mediate the Thermosensory  
844 Response in Arabidopsis. *Cell* *140*, 136–147.
- 845 Lampropoulos, A., Sutikovic, Z., Wenzl, C., Maegele, I., Lohmann, J.U., and Forner, J. (2013).  
846 GreenGate - A Novel, Versatile, and Efficient Cloning System for Plant Transgenesis. *PLoS One* *8*,  
847 e83043.
- 848 Law, J.A., and Jacobsen, S.E. (2010). Establishing, maintaining and modifying DNA methylation  
849 patterns in plants and animals. *Nat. Rev. Genet.* *11*, 204–220.
- 850 Law, J.A., Ausin, I., Johnson, L.M., Vashisht, A.A., Zhu, J.K., Wohlschlegel, J.A., and Jacobsen, S.E.  
851 (2010). A Protein Complex Required for Polymerase V Transcripts and RNA- Directed DNA  
852 Methylation in plants. *Curr. Biol.* *20*, 951–956.
- 853 Li, H., Ilin, S., Wang, W., Duncan, E.M., Wysocka, J., Allis, C.D., and Patel, D.J. (2006). Molecular  
854 basis for site-specific read-out of histone H3K4me3 by the BPTF PHD finger of NURF. *Nature* *442*,  
855 91–95.
- 856 Lister, R., Pelizzola, M., Downen, R., Hawkins, R.D., Hon, G., Nery, J., Lee, L., Ye, Z., Ngo, Q., Edsall, L.,  
857 et al. (2009). Human DNA methylomes at base resolution show widespread epigenomic  
858 differences. *Nature* *462*, 315–322.
- 859 Liu, S., Yu, Y., Ruan, Y., Meyer, D., Wolff, M., Xu, L., Wang, N., Steinmetz, A., and Shen, W.H.  
860 (2007). Plant SET- and RING-associated domain proteins in heterochromatinization. *Plant J.* *52*,  
861 914–926.
- 862 Love, M.I., Huber, W., and Anders, S. (2014). Moderated estimation of fold change and dispersion  
863 for RNA-seq data with DESeq2. *Genome Biol.* *15*, 550.
- 864 Mandin, P., and Johansson, J. (2020). Feeling the heat at the millennium: Thermosensors playing  
865 with fire. *Mol. Microbiol.* *113*, 588–592.
- 866 Mashiguchi, K., Tanaka, K., Sakai, T., Sugawara, S., Kawaide, H., Natsume, M., Hanada, A., Yaeno,  
867 T., Shirasu, K., Yao, H., et al. (2011). The main auxin biosynthesis pathway in Arabidopsis. *Proc.*  
868 *Natl. Acad. Sci. U. S. A.* *108*, 18512–18517.
- 869 Mathieu, O., Probst, A. V., and Paszkowski, J. (2005). Distinct regulation of histone H3 methylation  
870 at lysines 27 and 9 by CpG methylation in Arabidopsis. *EMBO J.* *24*, 2783–2791.
- 871 Matzke, M.A., and Birchler, J.A. (2005). RNAi-mediated pathways in the nucleus. *Nat. Rev. Genet.*

872 6, 24–35.

873 Mohammad, F., Mondal, T., Guseva, N., Pandey, G.K., and Kanduri, C. (2010). Kcnq1ot1 noncoding  
874 RNA mediates transcriptional gene silencing by interacting with Dnmt1. *Development* 137, 2493–  
875 2499.

876 Moison, M., Pacheco, J.M., Lucero, L., Fonouni-Farde, C., Rodríguez-Melo, J., Christ, A., Bazin, J.,  
877 Benhamed, M., Ibañez, F., Crespi, M., et al. (2021). The lncRNA APOLO interacts with the  
878 transcription factor WRKY42 to trigger root hair cell expansion in response to cold. *BioRxiv*  
879 2020.07.13.188763. *Molecular Plant* (accepted, in press)

880 Nady, N., Lemak, A., Walker, J.R., Avvakumov, G. V., Kareta, M.S., Achour, M., Xue, S., Duan, S.,  
881 Allali-Hassani, A., Zuo, X., et al. (2011). Recognition of multivalent histone states associated with  
882 heterochromatin by UHRF1 protein. *J. Biol. Chem.* 286, 24300–24311.

883 Nagymihály, M., Veluchamy, A., Györgypál, Z., Ariel, F., Jégu, T., Benhamed, M., Szücs, A., Kereszt,  
884 A., Mergaert, P., and Kondorosi, É. (2017). Ploidy-dependent changes in the epigenome of  
885 symbiotic cells correlate with specific patterns of gene expression. *Proc. Natl. Acad. Sci. U. S. A.*  
886 114, 4543–4548.

887 Naydenov, M., Baev, V., Apostolova, E., Gospodinova, N., Sablok, G., Gozmanova, M., and  
888 Yahubyan, G. (2015). High-temperature effect on genes engaged in DNA methylation and affected  
889 by DNA methylation in *Arabidopsis*. *Plant Physiol Biochem* 87, 102–108.

890 Nishiyama, A., Yamaguchi, L., Sharif, J., Johmura, Y., Kawamura, T., Nakanishi, K., Shimamura, S.,  
891 Arita, K., Kodama, T., Ishikawa, F., et al. (2013). Uhrf1-dependent H3K23 ubiquitylation couples  
892 maintenance DNA methylation and replication. *Nature* 502, 249–253.

893 Pajoro, A., Severing, E., Angenent, G.C., and Immink, R.G.H. (2017). Histone H3 lysine 36  
894 methylation affects temperature-induced alternative splicing and flowering in plants. *Genome*  
895 *Biol.* 18, 102.

896 Parent, B., and Tardieu, F. (2012). Temperature responses of developmental processes have not  
897 been affected by breeding in different ecological areas for 17 crop species. *New Phytol.* 194, 760–  
898 774.

899 Peña, P. V., Davrazou, F., Shi, X., Walter, K.L., Verkhusha, V. V., Gozani, O., Zhao, R., and  
900 Kutateladze, T.G. (2006). Molecular mechanism of histone H3K4me3 recognition by plant  
901 homeodomain of ING2. *Nature* 442, 100–103.

902 Piacentini, L., Fanti, L., Negri, R., Del Vescovo, V., Fatica, A., Altieri, F., and Pimpinelli, S. (2009).  
903 Heterochromatin Protein 1 (HP1a) positively regulates euchromatic gene expression through RNA

904 transcript association and interaction with hnRNPs in *Drosophila*. *PLoS Genet.* 5, e1000670.

905 Pikaard, C.S., Haag, J.R., Ream, T., and Wierzbicki, A.T. (2008). Roles of RNA polymerase IV in gene  
906 silencing. *Trends Plant Sci.* 13, 390–397.

907 Popova, O. V., Dinh, H.Q., Aufsatz, W., and Jonak, C. (2013). The RdDM Pathway Is Required for  
908 Basal Heat Tolerance in *Arabidopsis*. *Mol. Plant* 6, 396–410.

909 Qian, X., Zhao, J., Yeung, P.Y., Zhang, Q.C., and Kwok, C.K. (2019). Revealing lncRNA Structures and  
910 Interactions by Sequencing-Based Approaches. *Trends Biochem. Sci.* 44, 33–52.

911 Ramsahoye, B.H., Biniszkiwicz, D., Lyko, F., Clark, V., Bird, A.P., and Jaenisch, R. (2000). Non-CpG  
912 methylation is prevalent in embryonic stem cells and may be mediated by DNA methyltransferase  
913 3a. *Proc. Natl. Acad. Sci. U. S. A.* 97, 5237–5242.

914 Rigo, R., Bazin, J., Romero-Barrios, N., Moison, M., Lucero, L., Christ, A., Benhamed, M., Blein, T.,  
915 Huguet, S., Charon, C., et al. (2020). The *Arabidopsis* lncRNA ASCO modulates the transcriptome  
916 through interaction with splicing factors. *EMBO Rep.* 21, e48977.

917 Rizzardì, K., Landberg, K., Nilsson, L., Ljung, K., and Sundås-Larsson, A. (2011). TFL2/LHP1 is  
918 involved in auxin biosynthesis through positive regulation of YUCCA genes. *Plant J.* 65, 897–906.

919 Rose, N.R., and Klose, R.J. (2014). Understanding the relationship between DNA methylation and  
920 histone lysine methylation. *Biochim. Biophys. Acta - Gene Regul. Mech.* 1839, 1362–1372.

921 Rothbart, S.B., Krajewski, K., Nady, N., Tempel, W., Xue, S., Badeaux, A.I., Barsyte-Lovejoy, D.,  
922 Martinez, J.Y., Bedford, M.T., Fuchs, S.M., et al. (2012). Association of UHRF1 with methylated  
923 H3K9 directs the maintenance of DNA methylation. *Nat. Struct. Mol. Biol.* 19, 1155–1160.

924 Di Ruscio, A., Ebralidze, A.K., Benoukraf, T., Amabile, G., Goff, L.A., Terragni, J., Figueroa, M.E., De  
925 Figueiredo Pontes, L.L., Alberich-Jorda, M., Zhang, P., et al. (2013). DNMT1-interacting RNAs block  
926 gene-specific DNA methylation. *Nature* 503, 371–376.

927 Sakata, T., Oshino, T., Miura, S., Tomabechi, M., Tsunaga, Y., Higashitani, N., Miyazawa, Y.,  
928 Takahashi, H., Watanabe, M., and Higashitani, A. (2010). Auxins reverse plant male sterility caused  
929 by high temperatures. *Proc. Natl. Acad. Sci. U. S. A.* 107, 8569–8574.

930 Schindelin, J., Arganda-Carreras, I., Frise, E., Kaynig, V., Longair, M., Pietzsch, T., Preibisch, S.,  
931 Rueden, C., Saalfeld, S., Schmid, B., et al. (2012). Fiji: An open-source platform for biological-image  
932 analysis. *Nat. Methods* 9, 676–682.

933 Severing, E., Faino, L., Jamge, S., Busscher, M., Kuijter-Zhang, Y., Bellinazzo, F., Busscher-Lange, J.,  
934 Fernández, V., Angenent, G.C., Immink, R.G.H., et al. (2018). *Arabidopsis thaliana* ambient  
935 temperature responsive lncRNAs. *BMC Plant Biol.* 18, 145.

936 Sharif, J., Muto, M., Takebayashi, S.I., Suetake, I., Iwamatsu, A., Endo, T.A., Shinga, J., Mizutani-  
937 Koseki, Y., Toyoda, T., Okamura, K., et al. (2007). The SRA protein Np95 mediates epigenetic  
938 inheritance by recruiting Dnmt1 to methylated DNA. *Nature* *450*, 908–912.

939 Shen, X., De Jonge, J., Forsberg, S.K.G., Pettersson, M.E., Sheng, Z., Hennig, L., and Carlborg, Ö.  
940 (2014). Natural CMT2 Variation Is Associated With Genome-Wide Methylation Changes and  
941 Temperature Seasonality. *PLoS Genet.* *10*, e1004842.

942 Shi, X., Hong, T., Walter, K.L., Ewalt, M., Michishita, E., Hung, T., Carney, D., Peña, P., Lan, F.,  
943 Kaadige, M.R., et al. (2006). ING2 PHD domain links histone H3 lysine 4 methylation to active gene  
944 repression. *Nature* *442*, 96–99.

945 Shook, M.S., and Richards, E.J. (2014). VIM proteins regulate transcription exclusively through the  
946 MET1 cytosine methylation pathway. *Epigenetics* *9*, 980–986.

947 Sidaway-Lee, K., Costa, M.J., Rand, D.A., Finkenstadt, B., and Penfield, S. (2014). Direct  
948 measurement of transcription rates reveals multiple mechanisms for configuration of the  
949 *Arabidopsis* ambient temperature response. *Genome Biol.* *15*, R45.

950 Siegfried, N.A., Busan, S., Rice, G.M., Nelson, J.A.E., and Weeks, K.M. (2014). RNA motif discovery  
951 by SHAPE and mutational profiling (SHAPE-MaP). *Nat. Methods* *11*, 959–965.

952 Skourti-Stathaki, K., Torlai Triglia, E., Warburton, M., Voigt, P., Bird, A., and Pombo, A. (2019). R-  
953 Loops Enhance Polycomb Repression at a Subset of Developmental Regulator Genes. *Mol. Cell* *73*,  
954 930-945.e4.

955 Smallwood, A., Estève, P.O., Pradhan, S., and Carey, M. (2007). Functional cooperation between  
956 HP1 and DNMT1 mediates gene silencing. *Genes Dev.* *21*, 1169–1178.

957 Smola, M.J., and Weeks, K.M. (2018). In-cell RNA structure probing with SHAPE-MaP. *Nat. Protoc.*  
958 *13*, 1181–1195.

959 Somero, G.N. (2018). RNA thermosensors: How might animals exploit their regulatory potential? *J.*  
960 *Exp. Biol.* *221*.

961 Soppe, W.J.J., Jasencakova, Z., Houben, A., Kakutani, T., Meister, A., Huang, M.S., Jacobsen, S.E.,  
962 Schubert, I., and Fransz, P.F. (2002). DNA methylation controls histone H3 lysine 9 methylation and  
963 heterochromatin assembly in *Arabidopsis*. *EMBO J.* *21*, 6549–6559.

964 Sorenson, R., and Bailey-Serres, J. (2015). Rapid immunopurification of ribonucleoprotein  
965 complexes of plants. *Methods Mol. Biol.* *1284*, 209–219.

966 Spitale, R.C., Flynn, R.A., Zhang, Q.C., Crisalli, P., Lee, B., Jung, J.W., Kuchelmeister, H.Y., Batista,  
967 P.J., Torre, E.A., Kool, E.T., et al. (2015). Structural imprints in vivo decode RNA regulatory

- 968 mechanisms. *Nature* *519*, 486–490.
- 969 Steffen, A., and Staiger, D. (2017). Chromatin marks and ambient temperature-dependent  
970 flowering strike up a novel liaison. *Genome Biol.* *18*, 119.
- 971 Stroud, H., Greenberg, M.V.C., Feng, S., Bernatavichute, Y. V., and Jacobsen, S.E. (2013).  
972 Comprehensive analysis of silencing mutants reveals complex regulation of the Arabidopsis  
973 methylome. *Cell* *152*, 352–364.
- 974 Stroud, H., Do, T., Du, J., Zhong, X., Feng, S., Johnson, L., Patel, D.J., and Jacobsen, S.E. (2014). Non-  
975 CG methylation patterns shape the epigenetic landscape in Arabidopsis. *Nat. Struct. Mol. Biol.* *21*,  
976 64–72.
- 977 Susila, H., Nasim, Z., and Ahn, J.H. (2018). Ambient temperature-responsive mechanisms  
978 coordinate regulation of flowering time. *Int. J. Mol. Sci.* *19*, 3196.
- 979 Suzuki, M.M., and Bird, A. (2008). DNA methylation landscapes: Provocative insights from  
980 epigenomics. *Nat. Rev. Genet.* *9*, 465–476.
- 981 Tamaru, H., and Selker, E.U. (2001). A histone H3 methyltransferase controls DNA methylation in  
982 *Neurospora crassa*. *Nature* *414*, 277–283.
- 983 Taniue, K., Kurimoto, A., Sugimasa, H., Nasu, E., Takeda, Y., Iwasaki, K., Nagashima, T., Okada-  
984 Hatakeyama, M., Oyama, M., Kozuka-Hata, H., et al. (2016). Long noncoding RNA UPAT promotes  
985 colon tumorigenesis by inhibiting degradation of UHRF1. *Proc. Natl. Acad. Sci. U. S. A.* *113*, 1273–  
986 1278.
- 987 Tariq, M., Saze, H., Probst, A. V., Lichota, J., Habu, Y., and Paszkowski, J. (2003). Erasure of CpG  
988 methylation in Arabidopsis alters patterns of histone H3 methylation in heterochromatin. *Proc.*  
989 *Natl. Acad. Sci. U. S. A.* *100*, 8823–8827.
- 990 Tasset, C., Singh Yadav, A., Sureshkumar, S., Singh, R., van der Woude, L., Nekrasov, M.,  
991 Tremethick, D., van Zanten, M., and Balasubramanian, S. (2018). POWERDRESS-mediated histone  
992 deacetylation is essential for thermomorphogenesis in Arabidopsis thaliana. *PLOS Genet.* *14*,  
993 e1007280.
- 994 Turck, F., Roudier, F., Farrona, S., Martin-Magniette, M.-L., Guillaume, E., Buisine, N., Gagnot, S.,  
995 Martienssen, R.A., Coupland, G., and Colot, V. (2007). Arabidopsis TFL2/LHP1 Specifically  
996 Associates with Genes Marked by Trimethylation of Histone H3 Lysine 27. *PLoS Genet.* *3*, e86.
- 997 Unoki, M., Nishidate, T., and Nakamura, Y. (2004). ICBP90, an E2F-1 target, recruits HDAC1 and  
998 binds to methyl-CpG through its SRA domain. *Oncogene* *23*, 7601–7610.
- 999 Varley, K.E., Gertz, J., Bowling, K.M., Parker, S.L., Reddy, T.E., Pauli-Behn, F., Cross, M.K., Williams,



1000 B.A., Stamatoyannopoulos, J.A., Crawford, G.E., et al. (2013). Dynamic DNA methylation across  
1001 diverse human cell lines and tissues. *Genome Res.* *23*, 555–567.

1002 Veluchamy, A., Jégu, T., Ariel, F., Latrasse, D., Mariappan, K.G., Kim, S.K., Crespi, M., Hirt, H.,  
1003 Bergounioux, C., Raynaud, C., et al. (2016). LHP1 Regulates H3K27me3 Spreading and Shapes the  
1004 Three-Dimensional Conformation of the Arabidopsis Genome. *PLoS One* *11*, e0158936.

1005 Vernié, T., Kim, J., Frances, L., Ding, Y., Sun, J., Guan, D., Niebel, A., Gifford, M.L., de Carvalho-  
1006 Niebel, F., and Oldroyd, G.E.D. (2015). The NIN Transcription Factor Coordinates Diverse  
1007 Nodulation Programs in Different Tissues of the *Medicago truncatula* Root. *Plant Cell* *27*, 3410–  
1008 3424.

1009 Waadt, R., and Kudla, J. (2008). In planta visualization of protein interactions using bimolecular  
1010 fluorescence complementation (BiFC). *Cold Spring Harb. Protoc.* *3*.

1011 Wang, H., Cao, D., and Wu, F. (2018). Long noncoding RNA UPAT promoted cell proliferation via  
1012 increasing UHRF1 expression in non-small cell lung cancer. *Oncol. Lett.* *16*, 1491–1498.

1013 Wang, Y., Fan, X., Lin, F., He, G., Terzaghi, W., Zhu, D., and Deng, X.W. (2014). Arabidopsis  
1014 noncoding RNA mediates control of photomorphogenesis by red light. *Proc. Natl. Acad. Sci. U. S. A.*  
1015 *111*, 10359–10364.

1016 Wassenegger, M., Heimes, S., Riedel, L., and Sängler, H.L. (1994). RNA-directed de novo  
1017 methylation of genomic sequences in plants. *Cell* *76*, 567–576.

1018 Winter, D., Vinegar, B., Nahal, H., Ammar, R., Wilson, G. V., and Provart, N.J. (2007). An “Electronic  
1019 Fluorescent Pictograph” Browser for Exploring and Analyzing Large-Scale Biological Data Sets. *PLoS*  
1020 *One* *2*, e718.

1021 Woo, H.R., Pontes, O., Pikaard, C.S., and Richards, E.J. (2007). VIM1, a methylcytosine-binding  
1022 protein required for centromeric heterochromatinization. *Genes Dev.* *21*, 267–277.

1023 Woo, H.R., Dittmer, T.A., and Richards, E.J. (2008). Three SRA-Domain Methylcytosine-Binding  
1024 Proteins Cooperate to Maintain Global CpG Methylation and Epigenetic Silencing in Arabidopsis.  
1025 *PLoS Genet.* *4*.

1026 Wysocka, J., Swigut, T., Xiao, H., Milne, T.A., Kwon, S.Y., Landry, J., Kauer, M., Tackett, A.J., Chait,  
1027 B.T., Badenhorst, P., et al. (2006). A PHD finger of NURF couples histone H3 lysine 4 trimethylation  
1028 with chromatin remodelling. *Nature* *442*, 86–90.

1029 Xu, W., Xu, H., Li, K., Fan, Y., Liu, Y., Yang, X., and Sun, Q. (2017). The R-loop is a common  
1030 chromatin feature of the Arabidopsis genome. *Nat. Plants* *3*, 704–714.

1031 Xue, B., Zhao, J., Feng, P., Xing, J., Wu, H., and Li, Y. (2019). Epigenetic mechanism and target

1032 therapy of uhrf1 protein complex in malignancies. *Onco. Targets. Ther.* *12*, 549–559.

1033 Yao, Y., Bilichak, A., Golubov, A., and Kovalchuk, I. (2012). ddm1 plants are sensitive to methyl  
1034 methane sulfonate and NaCl stresses and are deficient in DNA repair. *Plant Cell Rep.* *31*, 1549–  
1035 1561.

1036 Yu, M., and Ren, B. (2017). The Three-Dimensional Organization of Mammalian Genomes. *Annu.*  
1037 *Rev. Cell Dev. Biol.* *33*, 265–289.

1038 Yu, Y., Dong, A., and Shen, W.H. (2004). Molecular characterization of the tobacco SET domain  
1039 protein NtSET1 unravels its role in histone methylation, chromatin binding, and segregation. *Plant*  
1040 *J.* *40*, 699–711.

1041 Zemach, A., Kim, M.Y., Hsieh, P.H., Coleman-Derr, D., Eshed-Williams, L., Thao, K., Harmer, S.L.,  
1042 and Zilberman, D. (2013). The nucleosome remodeler DDM1 allows DNA methyltransferases to  
1043 access H1-containing heterochromatin. *Cell* *153*, 193–205.

1044 Zhang, X., Yazaki, J., Sundaresan, A., Cokus, S., Chan, S.W.L., Chen, H., Henderson, I.R., Shinn, P.,  
1045 Pellegrini, M., Jacobsen, S.E., et al. (2006). Genome-wide High-Resolution Mapping and Functional  
1046 Analysis of DNA Methylation in Arabidopsis. *Cell* *126*, 1189–1201.

1047 Zhang, Y., Chen, M., Siemiatkowska, B., Toleco, M.R., Jing, Y., Strotmann, V., Zhang, J., Stahl, Y.,  
1048 and Fernie, A.R. (2020). A Highly Efficient Agrobacterium-Mediated Method for Transient Gene  
1049 Expression and Functional Studies in Multiple Plant Species. *Plant Commun.* *1*, 100028.

1050 Zhao, Q., Zhang, J., Chen, R., Wang, L., Li, B., Cheng, H., Duan, X., Zhu, H., Wei, W., Li, J., et al.  
1051 (2016). Dissecting the precise role of H3K9 methylation in crosstalk with DNA maintenance  
1052 methylation in mammals. *Nat. Commun.* *7*, 1–12.

1053

1054

1055 **Figures and Legends**

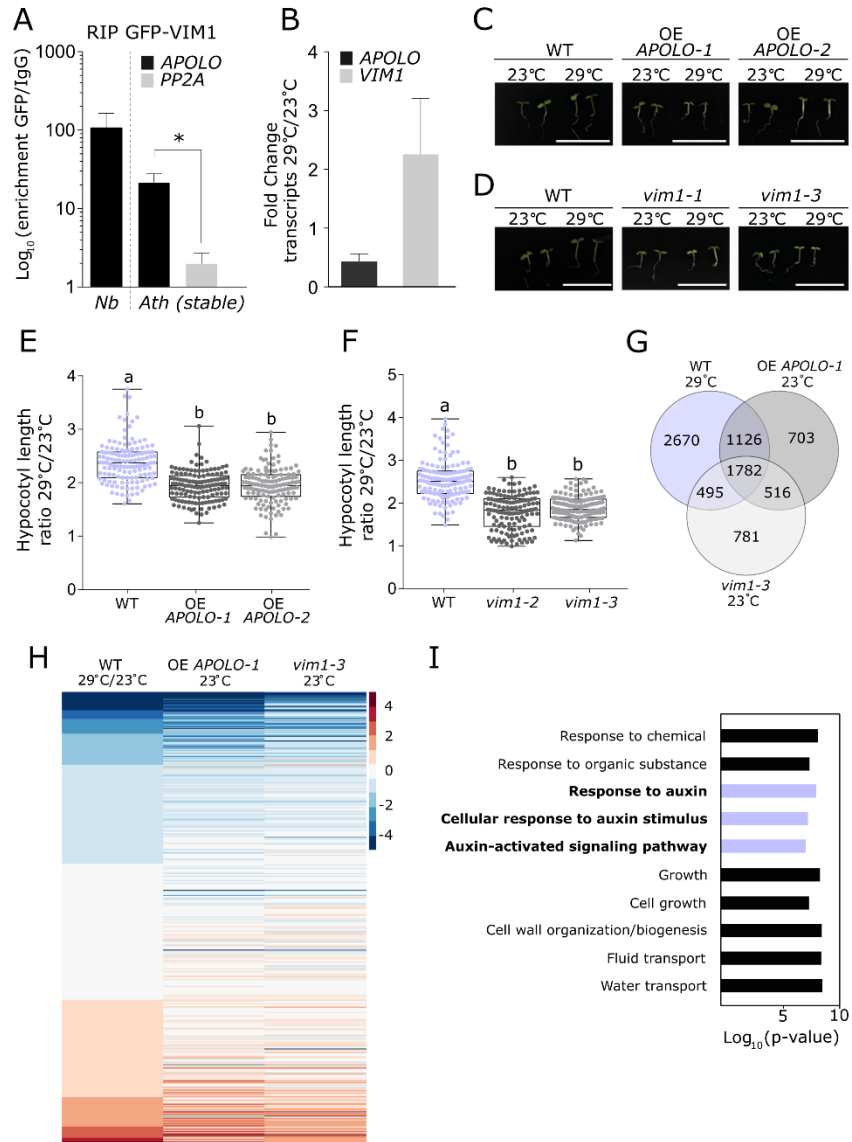

1056

1057 **Figure 1: The lncRNA *APOLO* and the methylcytosine-binding protein *VIM1* are**  
 1058 **thermomorphogenesis regulators**

1059 (A) RNA immunoprecipitation (RIP) assay in *Nicotiana benthamiana* leaves transiently co-  
 1060 transformed with *APOLO* and *GFP-VIM1* translational fusion expressed under the control of the  
 1061 35S-CaMV promoter, or in *Arabidopsis thaliana* 2-week-old *VIM1* over-expression (OE *VIM1-1*)  
 1062 seedlings. Results are expressed as the log<sub>10</sub> of the enrichment ratio of the GFP IP over the IgG IP.  
 1063 The non-specific background level of RNA precipitation (*PP2A*) is also shown in *Arabidopsis*. (B)  
 1064 Fold change of *APOLO* and *VIM1* expression levels in relation to 23 °C control conditions in 4-day-  
 1065 old wild-type (WT) seedlings treated with heat (29°C) for 6h. (C-D) Representative morphological  
 1066 phenotypes of 4-day-old *APOLO* over-expression (OE *APOLO-1*, OE *APOLO-2*) (in C) or *vim1* mutant  
 1067 (*vim1-2*, *vim1-3*) (in D) seedlings and their associated WT grown at 23°C or 29°C. Bars, 1cm. (E-F)

1068 Boxplots showing hypocotyl length quantification ratio at 29°C over 23°C of 4-day-old OE *APOLO-1*,  
1069 OE *APOLO-2* (**E**) or *vim1-2*, *vim1-3* (**F**) seedlings and their associated WT. Values are represented by  
1070 colored points. (**G**) Venn diagram of differentially expressed transcripts in WT treated with heat  
1071 (29°C) for 6h, and in untreated OE *APOLO-1* and *vim1-3* seedlings. (**H**) Heatmap showing log<sub>2</sub>(Fold  
1072 Change) compared to WT 23°C. A correlation of up- and down-regulated genes in WT in response  
1073 to 29°C is observed for OE *APOLO-1* and *vim1-3* at 23°C. (**I**) Gene Ontology (GO) enrichment  
1074 analysis of upregulated transcripts in WT treated with heat. Top ten GO categories with more  
1075 significant p-values are shown. Violet bars: auxin-related pathways. The ShinyGO Browser is  
1076 located at [bioinformatics.sdstate.edu](http://bioinformatics.sdstate.edu) and published in Ge and Jung (2018).  
1077 In (**A**), bars represent average ± SD (n = 3 biological replicates). The asterisk indicates significant  
1078 difference based on a t test ( $\alpha < 0.05$ ). In (**B**), transcript levels are normalized relatively to the  
1079 untreated control to show fold changes. Bars represent average ± SD (n = 3 biological replicates).  
1080 In (**E-F**), results are the mean of three biological replicates and letters indicate significant  
1081 differences compared to WT, based on a Kruskal-Wallis test ( $\alpha = 0.05$ ; n ≥ 134).  
1082

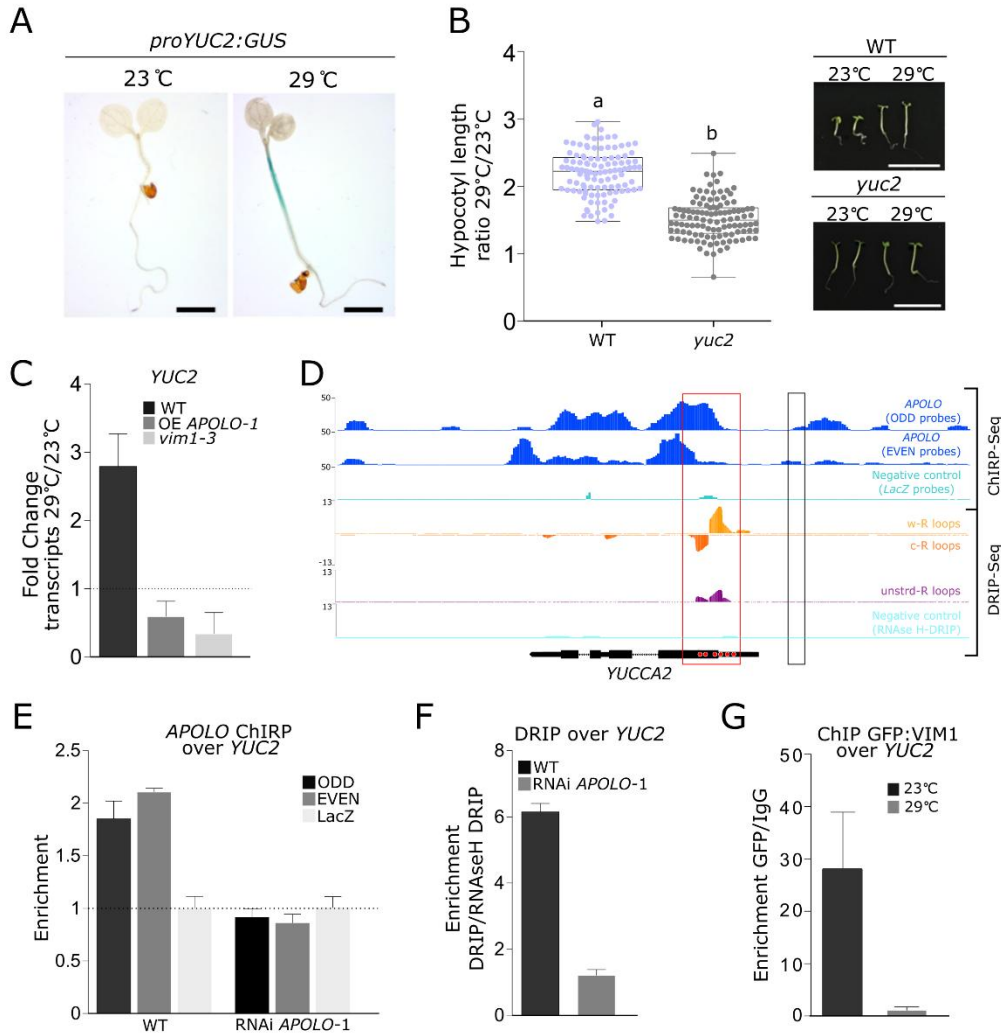

1083

1084 **Figure 2: The thermomorphogenesis-related gene *YUCCA2* is directly co-regulated by *APOLO* and**  
 1085 ***VIM1***

1086 (A) Histochemical localization of GUS activity in 4-day-old seedlings containing the p*YUCCA2*:GUS  
 1087 construct, grown at 23°C or 29°C. Scale bars, 0.1cm. (B) Boxplots showing hypocotyl length  
 1088 quantification ratio at 29°C over 23°C of 4-day-old *yuc2* seedlings and their associated wild-type  
 1089 (WT). Values are represented by colored points. Representative morphological phenotypes are  
 1090 shown on the right. Scale bars, 1 cm. (C) *YUCCA2* (*YUC2*) transcript levels in 4-days-old WT, OE  
 1091 *APOLO-1* and *vim1-3* seedlings treated or not with heat (29°C) for 6h. (D) Epigenetic profile at the  
 1092 *YUC2* locus. Tracks 1 to 3 (Ariel et al. 2020): *APOLO* recognition by chromatin isolation by RNA  
 1093 purification (ChIRP)-Sequencing, using ODD (Track 1) and EVEN (Track 2) sets of probes against  
 1094 *APOLO*. ChIRP negative control using LacZ probes is shown in Track 3. Tracks 4 to 7 (Xu et al. 2017):  
 1095 R-loop formation by DNA:RNA immunoprecipitation (DRIP)-Sequencing, on Watson (Track 4), Crick  
 1096 strand (Track 5) or unstranded sequencing (Track 6). DRIP negative control after RNaseH  
 1097 treatment is shown in Track 7. Gene annotation is shown at the bottom. On the *YUCCA2* schematic  
 1098 representation in the bottom, red dots indicate the presence of six GAAGAA/TTCTTC boxes which  
 1099 may mediate *APOLO* recognition according to Ariel et al. 2020. (E) *APOLO* association to DNA of  
 1100 the *YUC2* locus by ChIRP-qPCR in WT and RNAi *APOLO-1* plants. The background level was

1101 determined using a set of probes against LacZ RNA. **(F)** RNA-DNA hybrid (R-loop) formation at the  
1102 *YUC2* locus by DRIP-qPCR in WT and RNAi *APOLO-1* plants. **(G)** Chromatin immunoprecipitation  
1103 (ChIP)-qPCR analysis of VIM1 binding at the *YUC2* promoter in 4-day-old *VIM1* over-expression (OE  
1104 *VIM1-1*) seedlings treated or not with heat (29°C) for 6h.  
1105 In **(A)**, one representative picture out of ten stained seedlings is shown. In **(B)**, results are the  
1106 mean of three biological replicates and letters indicate significant differences compared to WT,  
1107 based on a Mann-Whitney test ( $\alpha = 0.05$ ;  $n \geq 110$ ). In **(C)**, transcript levels are normalized relatively  
1108 to the untreated control to show fold changes. Bars represent average  $\pm$  SD ( $n = 3$  biological  
1109 replicates). In **(E-F)**, bars represent average  $\pm$  SD ( $n = 3$  biological replicates). In **(G)**, results are  
1110 expressed as the enrichment ratio of the GFP IP over the IgG IP. Bars represent SD ( $n = 2$  technical  
1111 replicates). One representative experiment out of two biological replicates is shown.  
1112

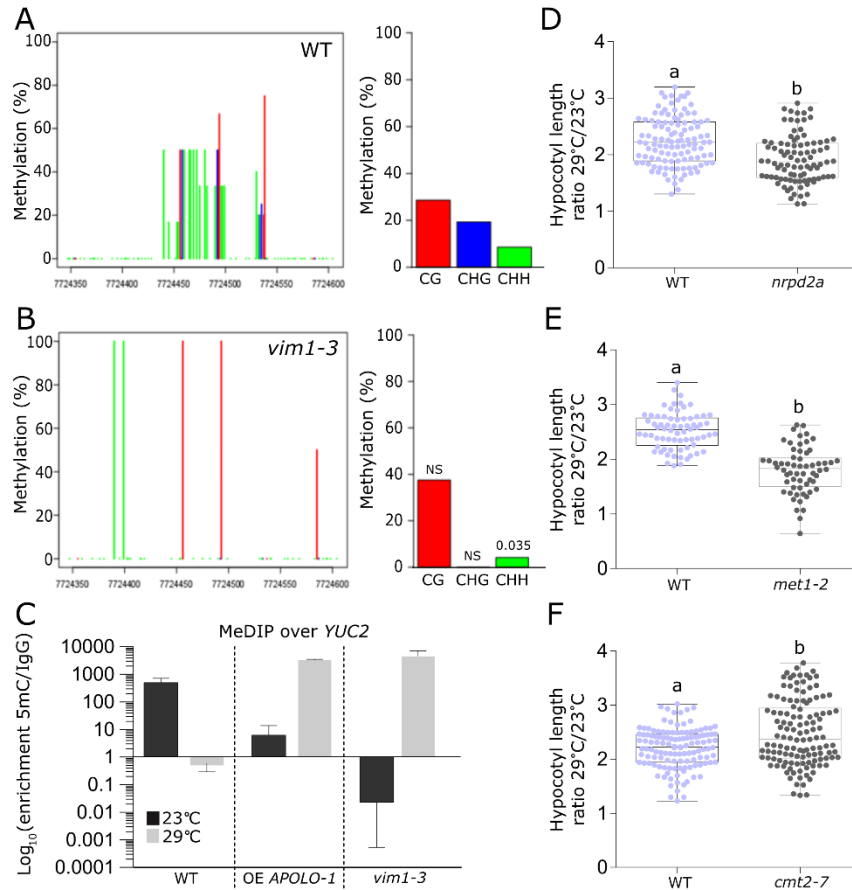

1113

1114

**Figure 3: *APOLLO* and *VIM1* mediate heat-dependent methylation at the *YUCCA2* promoter**

1115

(A-B) Quantification of DNA methylation at the *YUCCA2* (*YUC2*) promoter (Chr4:7,724,346-

1116

7,724,604) by bisulfite (BiS)-Sequencing, in the three sequence contexts CG (red bars), CHG (blue

1117

bars) and CHH (green bars), in 4 day-old wild-type (WT) (in A) or *vim1-3* (in B) mutant seedlings

1118

grown at 23°C. (C) Methylated DNA immunoprecipitation (MeDIP)-qPCR analysis at the *YUC2*

1119

promoter in 4-day-old *APOLLO* over-expression (OE *APOLLO-1*) or *vim1-3* mutant seedlings treated

1120

or not with heat (29°C) for 6h. (D-F) Boxplots showing hypocotyl length quantification at 29°C over

1121

23°C of 4-day-old *nrpd2a* (in D), *met1-2* (in E) or *cmt2-7* (in F) mutant seedlings and their

1122

associated WT. Values are represented by colored points.

1123

In (A-B), statistically significant differences between WT and *vim1-3* mutant were calculated using

1124

the Fisher's exact test. NS stands for not significant. In (C), results are expressed as the  $\text{Log}_{10}$  of the

1125

enrichment ratio of the 5mC IP over the IgG IP. Bars represent standard deviation (n = 2 biological

1126

replicates). In (D-F), results are the mean of three biological replicates and letters indicate

1127

significant differences compared to WT, based on a Mann-Whitney test ( $\alpha = 0.05$ ; n  $\geq$  60).

1128

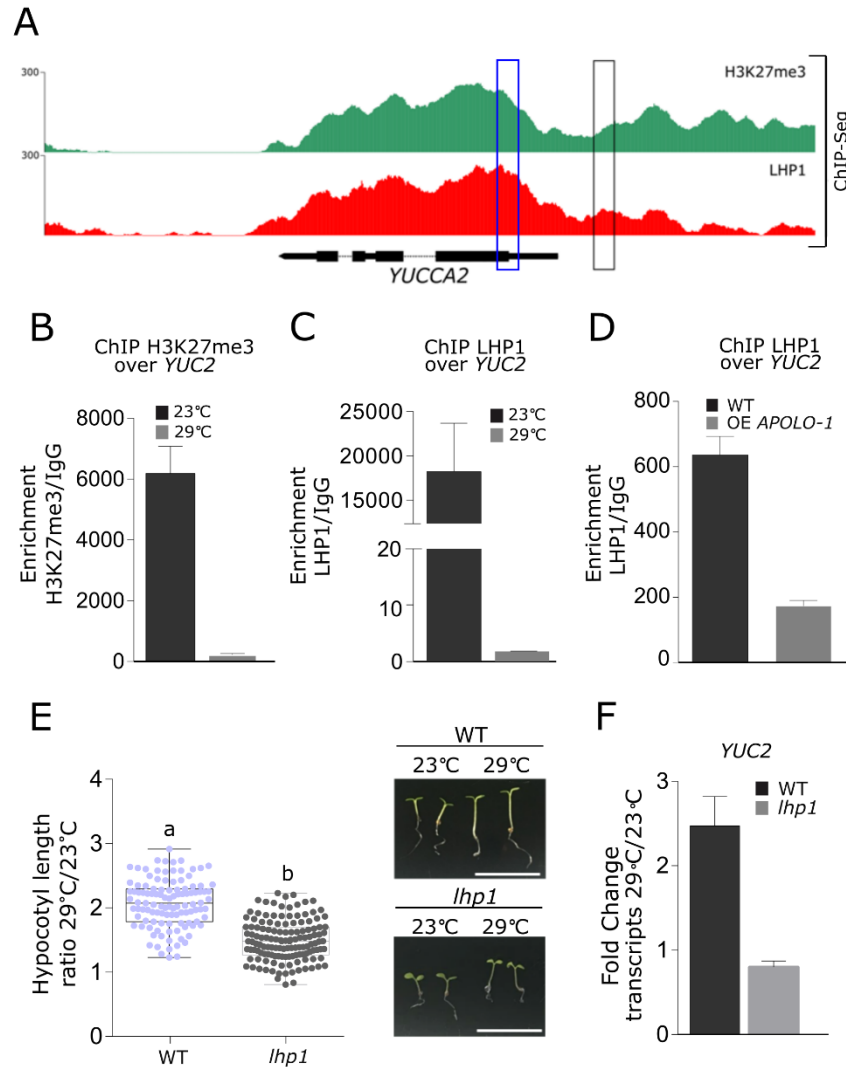

1129  
1130 (A) Epigenetic landscape at the *YUCA2* (*YUC2*) locus. Track 1: H3K27me3 deposition by ChIP-  
1131 sequencing. Track 2: LHP1 binding by ChIP-sequencing (Veluchamy et al. 2016). Gene annotation is  
1132 shown in the bottom. (B) ChIP-qPCR analysis of H3K27me3 deposition at the *YUC2* promoter in  
1133 4-day-old wild-type (WT) seedlings treated or not with heat (29°C) for 6h. (C) ChIP-qPCR analysis of  
1134 LHP1 binding at the *YUC2* promoter in 4-day-old WT seedlings treated or not with heat (29°C) for  
1135 6h. (D) ChIP-qPCR analysis of LHP1 binding at the *YUC2* gene body in WT and *APOLO* over-  
1136 expression (OE *APOLO-1*) plants. (E) Boxplots showing hypocotyl length quantification ratio at 29°C  
1137 over 23°C of 4-day-old *lhp1* seedlings and their associated WT. Values are represented by colored  
1138 points. Representative morphological phenotypes are shown on the right. Scale bars, 1 cm. (F)  
1139 *YUC2* transcript levels in 4-days-old WT and *lhp1* seedlings treated or not with heat (29°C) for 6h.  
1140 In (B-C), results are expressed as the enrichment ratio of the H3K27me3 IP (B) or LHP1 IP (C) over  
1141 the IgG IP. Bars represent standard deviation (n = 2 technical replicates). One representative  
1142 experiment out of three biological replicates is shown. In (D), bars represent average ± SD (n = 3  
1143 biological replicates). In (E), results are the mean of three biological replicates and letters indicate  
1144 significant differences compared to WT, based on a Mann-Whitney test ( $\alpha = 0.05$ ; n ≥ 111). In (F),  
1145 transcript levels are normalized relatively to the untreated control to show fold changes. Bars  
1146 represent average ± SD (n = 3 biological replicates).



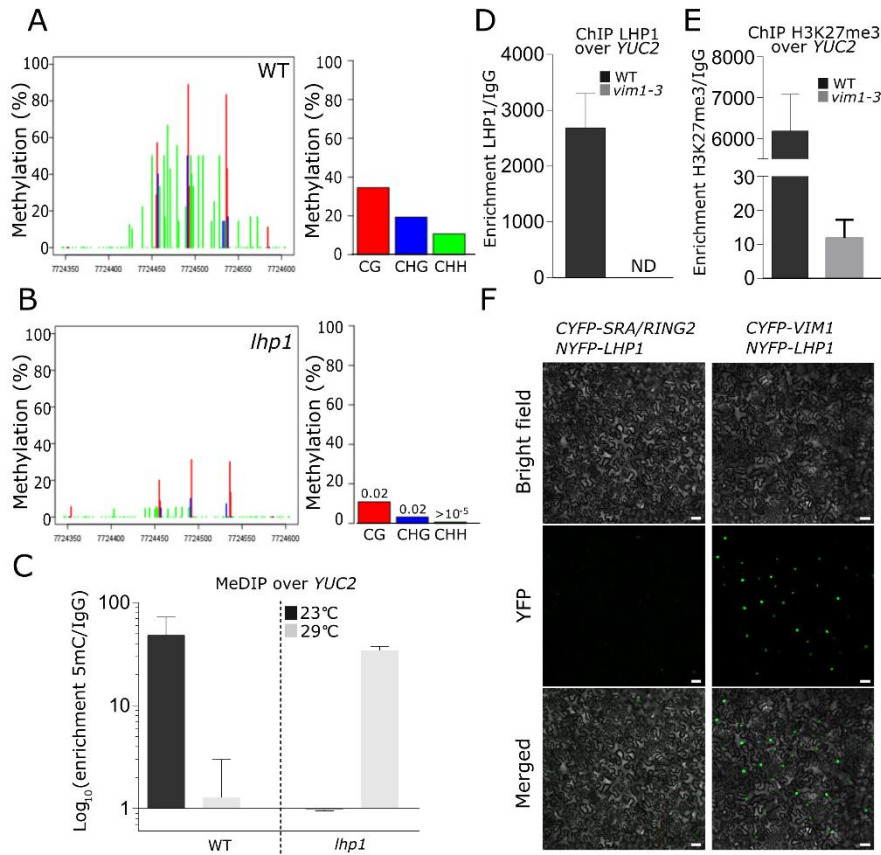

1147

1148

**Figure 5: VIM1 and LHP1 co-regulate histone and DNA methylation at the *YUCA2* promoter**

1149

(A-B) Quantification of DNA methylation at the *YUCA2* (*YUC2*) promoter (Chr4:7,724,346-

1150

7,724,604) by bisulfite (BiS)-sequencing, in the three sequence contexts CG (red bars), CHG (blue

1151

bars) and CHH (green bars), in wild-type (WT) (A) or *lhp1* (B) mutant seedlings. (C) Methylated

1152

DNA immunoprecipitation (MeDIP)-qPCR analysis at the *YUC2* promoter in 4-day-old *lhp1* mutant

1153

seedlings treated or not with heat (29°C) for 6h. (D-E) Chromatin immunoprecipitation (ChIP)-qPCR

1154

analyses of LHP1 binding (in D) and H3K27me3 deposition (in E) at the *YUC2* promoter in 4-day-old

1155

WT and *vim1-3* mutant seedlings. ND stands for not detected. (F) Bimolecular Fluorescence

1156

Complementation (BiFC) assay in transiently transformed *Nicotiana benthamiana* leaves. CYFP was

1157

fused to VIM1 or SRA/RING2 and NYFP was fused to LHP1. In both panels, bright-field images

1158

(top), YFP fluorescence (middle) and merged images (bottom) are shown. Scale bars, 50µm.

1159

In (A-B), statistically significant differences between WT and *lhp1* mutant were calculated using

1160

the Fisher's exact test. In (C), results are expressed as the enrichment ratio of the 5mC IP over the

1161

IgG IP. Bars represent standard deviation (n = 2 biological replicates). In (D-E), results are

1162

expressed as the enrichment ratio of the LHP1 (in D) or H3K27me3 IP (in E) over the IgG IP. Bars

1163

represent standard deviation (n = 2 technical replicates). One representative experiment out of

1164

three biological replicates is shown. In (F), one representative picture out of six biological

1165

replicates is shown.

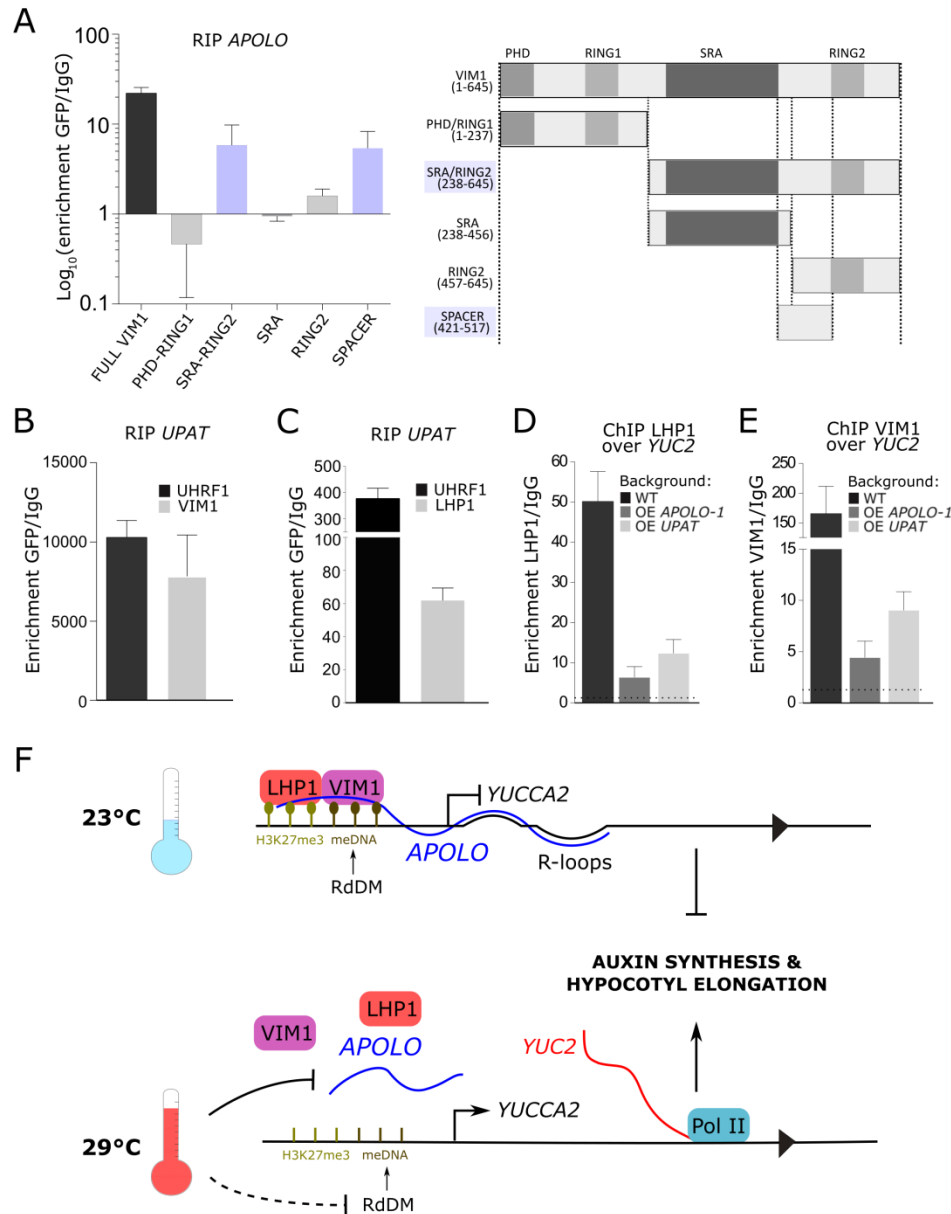

1166

1167

**Figure 6: The UHRHF1-interacting lncRNA *UPAT* binds to VIM1 and LHP1 in plant cells and decoys the complex away from chromatin**

1168

1169 (A) RNA immunoprecipitation (RIP) assay in *Nicotiana benthamiana* leaves transiently co-

1170 transformed with *APOLO* and translational fusions expressing GFP-VIM1 or derivatives (GFP-

1171 PHD/RING1, GFP-SRA/RING2, GFP-SRA, GFP-RING2, GFP-SPACER) under the control of the 35S-

1172 CaMV promoter. Results are expressed as the Log<sub>10</sub> of the enrichment ratio of the GFP IP over the

1173 IgG IP. Schematic representation of VIM1 protein and derivatives tested for RIP is shown on the

1174 right. Amino acid coordinates are indicated between brackets. (B-C) RIP assay in *N. benthamiana*

1175 leaves transiently co-transformed with *UPAT* and GFP-UHRF1, GFP-VIM1 (B) or LHP1-GFP (C)

1176 translational fusions expressed under the control of the 35S-CaMV promoter. Results are

1177 expressed as the enrichment ratio of the GFP IP over the IgG IP. (D-E) Chromatin

1178 immunoprecipitation (ChIP)-qPCR analysis of LHP1 (in D) and VIM1 (in E) binding at the *YUC2*

1179 promoter in wild-type (WT), *APOLO* over-expression (OE *APOLO-1*) and *UPAT* over-expression (OE

1180 *UPAT*) plants transiently transformed or not with *GFP-VIM1*. **(F)** Model for the regulation of *YUC2*  
1181 expression in response to heat by the *APOLO*-*VIM1*-*LHP1* complex: at 23°C, *APOLO* lncRNA  
1182 recognizes the *YUCCA2* (*YUC2*) locus by sequence complementarity and R-loop formation. *APOLO*  
1183 interacts with *VIM1* and *LHP1* over the *YUC2* promoter region, which exhibits RdDM and  
1184 H3K27me3 deposition, blocking *YUC2* transcription. meDNA (light brown balls) and H3K27me3  
1185 (dark brown balls) are cooperatively maintained by the *VIM1*-*LHP1* complex. At 29°C, *APOLO*  
1186 transcript levels decrease and *VIM1*-*LHP1* binding to the *YUC2* promoter region is reduced.  
1187 Conjointly, 24nt siRNAs accumulation is decreased, impairing RdDM over the *YUC2* promoter. As a  
1188 result, *YUC2* transcriptional activity increases. *YUC2* participates in auxin synthesis, promoting  
1189 hypocotyl elongation in response to heat.  
1190 In **(A-F)**, bars represent average  $\pm$  SD (n = 3 biological replicates).

1191
